# Supplementary material for: De novo glycan sequencing by electronic excitation dissociation MS 2 -guided MS 3 analysis on an Omnitrap-Orbitrap hybrid instrument
Source: Royal Society of Chemistry journal article supplement (doi:10.1039/d3sc00870c), 2023-01-01
Supplement: d3sc00870c1.pdf [file d3sc00870c1.pdf]

## Supporting Information for:

### **De Novo Glycan Sequencing by Electronic Excitation Dissociation MS<sup>2</sup>-Guided MS<sup>3</sup> Analysis on an Omnitrap-Orbitrap Hybrid Instrument**

Juan Wei,<sup>1,2</sup> Dimitris Papanastasiou,<sup>3</sup> Mariangela Kosmopoulou,<sup>3</sup> Athanasios Smyrnakis,<sup>3</sup> Pengyu Hong,<sup>4</sup> Nafisa Tursumamat,<sup>1</sup> Joshua A. Klein,<sup>2</sup> Chaoshuang Xia,<sup>2</sup> Yang Tang,<sup>2,5</sup> Joseph Zaia,<sup>2</sup> Catherine E. Costello,<sup>2,5</sup> Cheng Lin<sup>2</sup>

1. Shanghai Jiao Tong University, Shanghai, 800 Dongchuan Road, Shanghai, 200240, China
2. Center for Biomedical Mass Spectrometry, Boston University Chobanian & Avedisian School of Medicine, Boston, MA 02118, United States
3. Fasmatech Science and Technology, 15310 Athens, Greece
4. Department of Computer Science, Brandeis University, Waltham, MA 02454, United States
5. Department of Chemistry, Boston University, Boston, MA 02215, United States

### Corresponding Authors

Cheng Lin – Center for Biomedical Mass Spectrometry, Boston University Chobanian and Avedisian School of Medicine, Boston, Massachusetts 02118, United States; [orcid.org/0000-0003-3653-9633](https://orcid.org/0000-0003-3653-9633)

Phone: 1-617-358-2428

Email: [chenglin@bu.edu](mailto:chenglin@bu.edu)

Fax: 617-358-2416

Juan Wei – School of Pharmacy, Shanghai Jiao Tong University, 800 Dongchuan Road, Shanghai 200240, China

Phone: 86-21-3420-4048

Email: [wwwjuan@sjtu.edu.cn](mailto:wwwjuan@sjtu.edu.cn)

## Table of Contents

|                  |           |
|------------------|-----------|
| <b>Scheme S1</b> | Page S-3  |
| <b>Figure S1</b> | Page S-3  |
| <b>Figure S2</b> | Page S-4  |
| <b>Figure S3</b> | Page S-4  |
| <b>Figure S4</b> | Page S-5  |
| <b>Figure S5</b> | Page S-6  |
| <b>Table S1</b>  | Page S-7  |
| <b>Table S2</b>  | Page S-12 |
| <b>Table S3</b>  | Page S-16 |
| <b>Table S4</b>  | Page S-18 |
| <b>Table S5</b>  | Page S-20 |
| <b>Table S6</b>  | Page S-23 |
| <b>Table S7</b>  | Page S-27 |

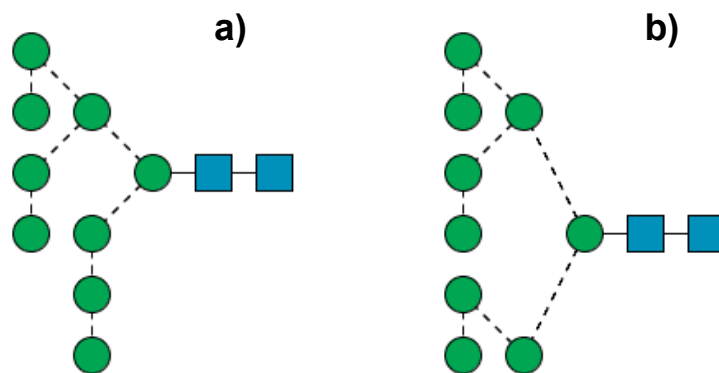

Scheme S1. SNFG representation of (a) the canonical  $\text{Man}_9\text{GlcNAc}_2$  structure, and (b) a hypothetical structure that can generate the same group of cross-ring and internal fragments as the true structure in (a).

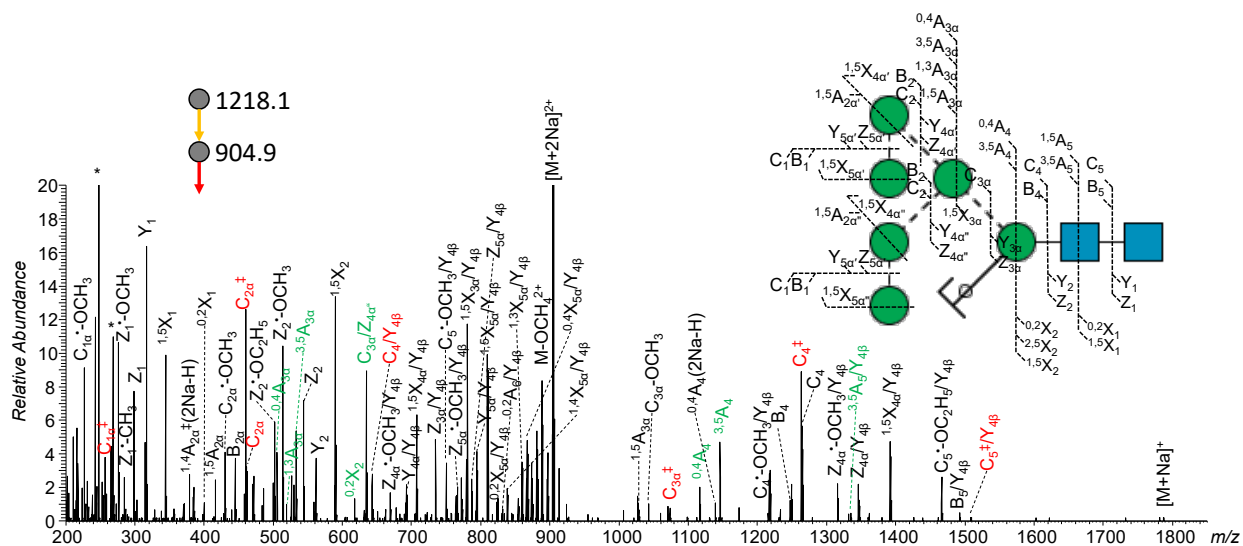

Figure S1. The QE-Omnitrap CID-EED  $\text{MS}^3$  spectrum of the  $\text{Y}_{3p}^{2+}$  ion ( $m/z$  904.9469) of deuterio-reduced and permethylated  $\text{Man}_9\text{GlcNAc}_2$ . Inset shows the cleavage map. An ion injection time of 20 ms and an electron irradiation time of 50 ms were used. The spectrum was acquired with 10 microscans. The complete series of glycosidic C-ions are labeled in red; linkage-diagnostic cross-ring and internal fragments are labeled in green. Asterisk denotes noise peaks with mass defects inconsistent with glycan fragments. A complete list of assigned fragments can be found in Supporting Table S5.

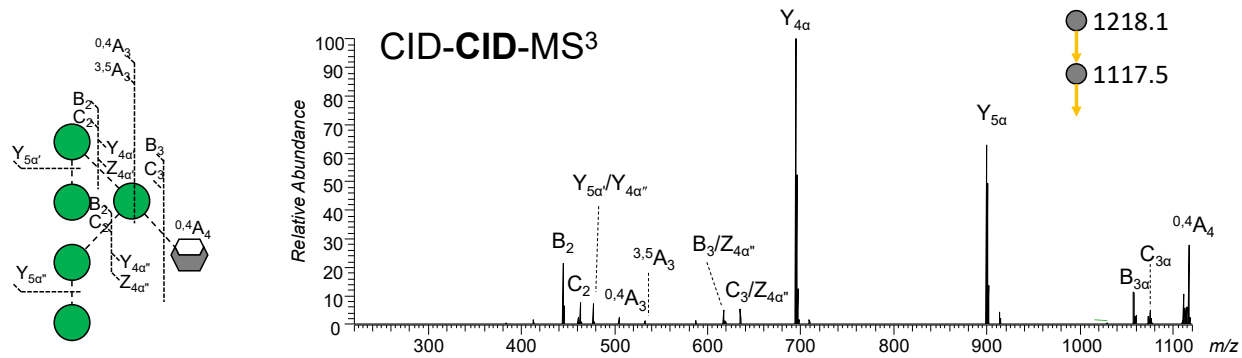

Figure S2. The QE-Omnitrap CID-CID MS<sup>3</sup> spectrum and the cleavage map of the CID fragment from deuterio-reduced and permethylated Man<sub>9</sub>GlcNAc<sub>2</sub> at *m/z* 1117.5259 (<sup>0,4</sup>A<sub>4</sub>).

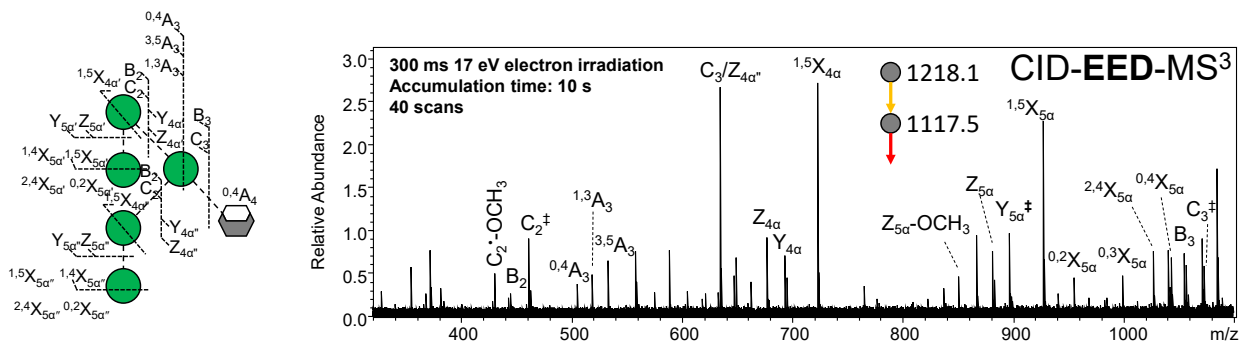

Figure S3. The FTICR CID-EED MS<sup>3</sup> spectrum and the cleavage map of the CID fragment from deuterio-reduced and permethylated Man<sub>9</sub>GlcNAc<sub>2</sub> at *m/z* 1117.5259 (<sup>0,4</sup>A<sub>4</sub>).

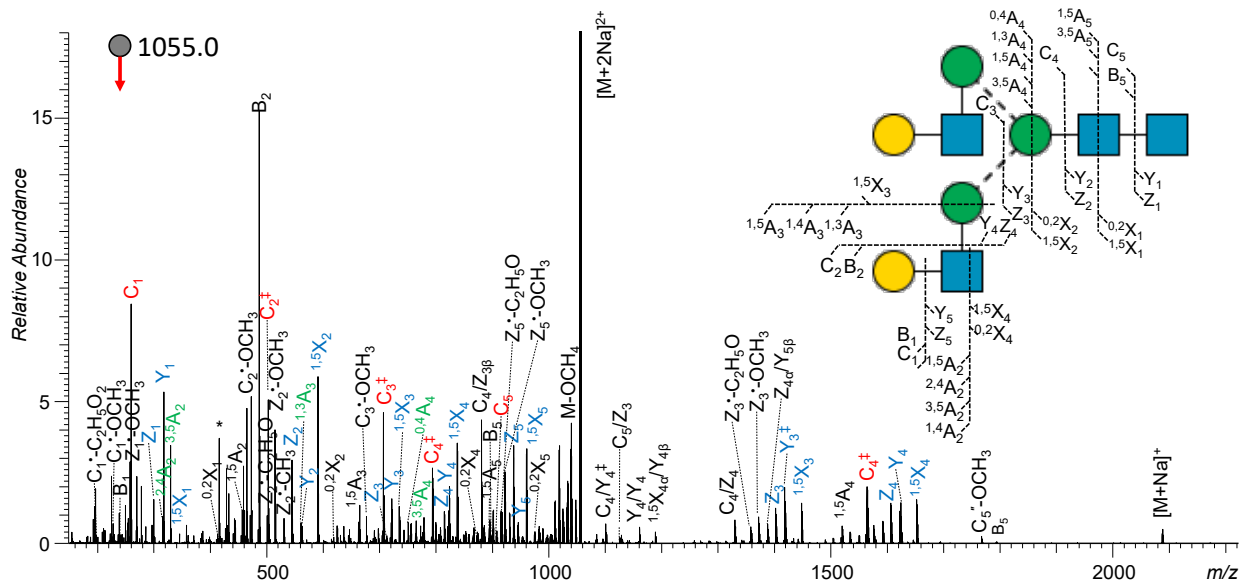

Figure S4. EED MS<sup>2</sup> spectrum and cleavage map of reduced- and permethylated G2 (Hex<sub>5</sub>HexNAc<sub>4</sub>, [M+2Na]<sup>2+</sup> at *m/z* 1055.0308) acquired on QE-Omnitrap MS. A complete series of C-ions and Y/Z/1.5X triplets are labeled in red and blue, respectively. Linkage-diagnostic cross-ring and internal fragments are labeled in green. A complete list of assigned fragments can be found in Supporting Tables S6.

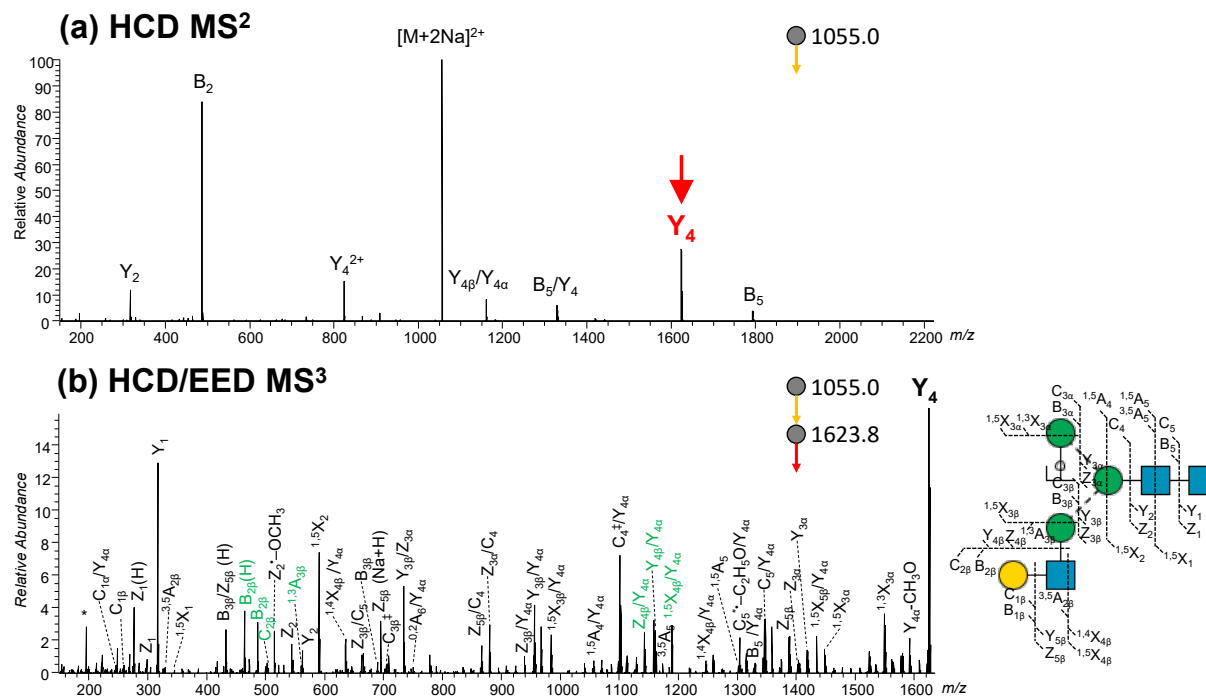

Figure S5. a) HCD (50 eV) MS<sup>2</sup> spectrum of reduced- and permethylated G2 (Hex<sub>5</sub>HexNAc<sub>4</sub>, [M+2Na]<sup>2+</sup> at *m/z* 1055.0315) acquired on QE-Omnitrap MS. The Y<sub>4</sub> ion highlighted at MS<sup>2</sup> was selected for MS<sup>3</sup> analysis. b) HCD-EED MS<sup>3</sup> spectrum of the Y<sub>4</sub> ion at *m/z* 1623.8311 acquired on QE-Omnitrap MS. The maximum ion injection time was 300 ms, and the electron (20 eV) irradiation time was 50 ms. The top-ranked topology of the EED MS<sup>3</sup> spectrum analyzed by GlycoDeNovo software is inserted correspondingly. All ions were detected in the orbitrap. Fragments diagnostic to the canonical G2 structure are labeled in green. A complete list of assigned fragments can be found in Supporting Tables S7.

**Table S1.** List of assigned fragments by EED MS<sup>2</sup> of deuterio-reduced and permethylated Man<sub>9</sub>GlcNAc<sub>2</sub> ([M+2Na]<sup>2+</sup> at *m/z* 1218.1042), acquired on the QE-Omnitrap instrument (spectrum shown in Figure 2a). All fragments are sodium adducts unless labeled otherwise. Multiple assignments are separated by commas; the double dagger symbol (‡) indicates that the fragment has two fewer hydrogens than the canonical structures; the double prime symbol (") indicates that the fragment has two more hydrogens than the canonical structure; the dot symbol (·) indicates a radical.

| <i>z</i> | Exp. <i>m/z</i> | Theo. <i>m/z</i> | Assignment                                                    | Δ, ppm |
|----------|-----------------|------------------|---------------------------------------------------------------|--------|
| 1        | 197.0783        | 197.0783         | C <sub>1</sub> ·-C <sub>2</sub> H <sub>5</sub> O              | 0.00   |
| 1        | 211.0939        | 211.0941         | B <sub>1</sub> ·-CH <sub>3</sub> O                            | -0.95  |
| 1        | 227.0888        | 227.0890         | C <sub>1</sub> ·-CH <sub>3</sub> O                            | -0.88  |
| 1        | 243.0838        | 243.0839         | C <sup>‡</sup> /Y (Hex)                                       | -0.41  |
| 1        | 253.1267        | 253.1269         | Z <sub>1</sub> <sup>‡</sup> -C <sub>2</sub> H <sub>5</sub> O  | -0.79  |
| 1        | 255.1422        | 255.1424         | Z <sub>1</sub> ·-C <sub>2</sub> H <sub>5</sub> O              | -0.78  |
| 1        | 257.0993        | 257.0996         | C <sub>1</sub> <sup>‡</sup>                                   | -1.17  |
| 1        | 259.1150        | 259.1152         | C <sub>1</sub>                                                | -0.77  |
| 1        | 269.1579        | 269.1582         | Z <sub>1</sub> ·-CH <sub>3</sub> O                            | -1.11  |
| 1        | 296.1101        | 296.1105         | B <sub>5</sub> <sup>/1,5</sup> X <sub>1</sub>                 | -1.35  |
| 1        | 299.1686        | 299.1687         | Z <sub>1</sub>                                                | -0.33  |
| 1        | 313.1257        | 313.1258         | <sup>1,3</sup> A <sub>2</sub> <sup>‡</sup>                    | -0.32  |
| 1        | 315.1043        | 315.1050         | C <sub>2</sub> <sup>‡</sup> / <sup>2,5</sup> X <sub>5</sub>   | -2.22  |
| 1        | 315.1410        | 315.1414         | <sup>1,3</sup> A <sub>2</sub>                                 | -1.27  |
| 1        | 315.1632        | 315.1637         | Y <sub>1</sub> <sup>‡</sup>                                   | -1.59  |
| 1        | 317.1791        | 317.1793         | Y <sub>1</sub>                                                | -0.63  |
| 1        | 329.1204        | 329.1207         | C <sub>2</sub> <sup>‡</sup> / <sup>1,4</sup> X <sub>5</sub>   | -0.91  |
| 1        | 329.1570        | 329.1571         | <sup>1,4</sup> A <sub>2</sub> -CH <sub>3</sub> O              | -0.30  |
| 1        | 345.1740        | 345.1742         | <sup>1,5</sup> X <sub>1</sub>                                 | -0.58  |
| 1        | 357.1514        | 357.1520         | <sup>1,4</sup> A <sub>2</sub> <sup>‡</sup>                    | -1.68  |
| 1        | 371.1674        | 371.1676         | B <sub>2β</sub> <sup>/0,4</sup> X <sub>5β</sub>               | -0.54  |
| 1        | 401.1781        | 401.1781         | C <sub>2</sub> ·-C <sub>2</sub> H <sub>5</sub> O <sub>2</sub> | 0.00   |
| 1        | 403.2156        | 403.2161         | <sup>1,4</sup> X <sub>1</sub>                                 | -1.24  |
| 1        | 413.1779        | 413.1782         | B <sub>3β</sub> / <sup>Z</sup> 5β                             | -0.73  |
| 1        | 414.2320        | 414.2321         | <sup>0,2</sup> X <sub>1</sub>                                 | -0.24  |
| 1        | 415.1936        | 415.1939         | <sup>1,5</sup> A <sub>2</sub> <sup>‡</sup>                    | -0.72  |
| 1        | 417.1730        | 417.1732         | C <sub>2</sub> ·-C <sub>2</sub> H <sub>5</sub> O              | -0.48  |
| 1        | 417.2092        | 417.2095         | <sup>1,5</sup> A <sub>2</sub>                                 | -0.72  |

| z | Exp. <i>m/z</i> | Theo. <i>m/z</i> | Assignment                                                                                                                                                       | $\Delta$ , ppm |
|---|-----------------|------------------|------------------------------------------------------------------------------------------------------------------------------------------------------------------|----------------|
| 1 | 429.1731        | 429.1731         | C <sub>2</sub> <sup>+</sup> -CH <sub>3</sub> O                                                                                                                   | 0.00           |
| 1 | 431.1885        | 431.1888         | C <sub>2</sub> <sup>-</sup> -CH <sub>3</sub> O                                                                                                                   | -0.70          |
| 1 | 445.2042        | 445.2044         | B <sub>2</sub>                                                                                                                                                   | -0.45          |
| 1 | 447.1834        | 447.1837         | C <sub>3<math>\beta</math></sub> <sup>+</sup> /Y <sub>5<math>\beta</math></sub>                                                                                  | -0.67          |
| 1 | 458.2580        | 458.2583         | <sup>0,3</sup> X <sub>1</sub>                                                                                                                                    | -0.65          |
| 1 | 459.1836        | 459.1837         | B <sub>3<math>\beta</math></sub> / <sup>1,5</sup> X <sub>5<math>\beta</math></sub>                                                                               | -0.22          |
| 1 | 461.1990        | 461.1993         | C <sub>2</sub> <sup>‡</sup>                                                                                                                                      | -0.65          |
| 1 | 463.2158        | 463.2150         | C <sub>2</sub>                                                                                                                                                   | 1.73           |
| 1 | 475.1783        | 475.1786         | C <sub>3<math>\beta</math></sub> <sup>‡</sup> / <sup>1,5</sup> X <sub>5<math>\beta</math></sub>                                                                  | -0.63          |
| 1 | 484.2737        | 484.2740         | Z <sub>2</sub> <sup>-</sup> -C <sub>2</sub> H <sub>5</sub> O <sub>2</sub>                                                                                        | -0.62          |
| 1 | 487.2148        | 487.2150         | Z <sub>5<math>\beta</math></sub> / <sup>1,3</sup> A <sub>3<math>\beta</math></sub>                                                                               | -0.41          |
| 1 | 500.2687        | 500.2688         | Z <sub>2</sub> <sup>-</sup> -C <sub>2</sub> H <sub>5</sub> O                                                                                                     | -0.20          |
| 1 | 502.2844        | 502.2845         | Z <sub>2</sub> <sup>-</sup> -C <sub>2</sub> H <sub>5</sub> O                                                                                                     | -0.20          |
| 1 | 503.2094        | 503.2099         | <sup>0,4</sup> A <sub>3<math>\alpha</math></sub> <sup>‡</sup>                                                                                                    | -0.99          |
| 1 | 505.2253        | 505.2255         | <sup>0,4</sup> A <sub>3<math>\alpha</math></sub>                                                                                                                 | -0.40          |
| 1 | 514.2845        | 514.2845         | Z <sub>2</sub> <sup>-</sup> -CH <sub>3</sub> O                                                                                                                   | 0.00           |
| 1 | 517.2253        | 517.2255         | <sup>1,3</sup> A <sub>3<math>\beta</math></sub> , <sub>3<math>\alpha</math></sub> <sup>‡</sup>                                                                   | -0.39          |
| 1 | 519.2411        | 519.2412         | <sup>1,3</sup> A <sub>3<math>\beta</math></sub> , <sub>3<math>\alpha</math></sub>                                                                                | -0.19          |
| 1 | 530.2796        | 530.2794         | Z <sub>2</sub> <sup>-</sup> -CH <sub>3</sub>                                                                                                                     | 0.38           |
| 1 | 531.2415        | 531.2412         | <sup>3,5</sup> A <sub>3<math>\alpha</math></sub> <sup>‡</sup>                                                                                                    | 0.56           |
| 1 | 533.2568        | 533.2568         | <sup>3,5</sup> A <sub>3<math>\alpha</math></sub>                                                                                                                 | 0.00           |
| 1 | 544.2950        | 544.2951         | Z <sub>2</sub>                                                                                                                                                   | -0.18          |
| 1 | 547.2364        | 547.2361         | <sup>0,3</sup> A <sub>3<math>\alpha</math></sub> <sup>‡</sup>                                                                                                    | 0.55           |
| 1 | 549.2521        | 549.2518         | <sup>0,3</sup> A <sub>3<math>\alpha</math></sub>                                                                                                                 | 0.55           |
| 1 | 560.2924        | 560.2900         | Y <sub>2</sub> <sup>‡</sup>                                                                                                                                      | 4.28           |
| 1 | 561.2524        | 561.2518         | <sup>1,4</sup> A <sub>3<math>\beta</math></sub> , <sub>3<math>\alpha</math></sub> <sup>‡</sup>                                                                   | 1.07           |
| 1 | 562.3060        | 562.3056         | Y <sub>2</sub>                                                                                                                                                   | 0.71           |
| 1 | 563.2672        | 563.2674         | <sup>1,4</sup> A <sub>3<math>\beta</math></sub> , <sub>3<math>\alpha</math></sub>                                                                                | -0.36          |
| 1 | 575.2677        | 575.2674         | B <sub>3<math>\beta</math></sub> / <sup>0,4</sup> X <sub>5<math>\beta</math></sub>                                                                               | 0.52           |
| 1 | 590.3009        | 590.3005         | <sup>1,5</sup> X <sub>2</sub>                                                                                                                                    | 0.68           |
| 1 | 605.2782        | 605.2779         | C <sub>3<math>\beta</math></sub> <sup>-</sup> -C <sub>2</sub> H <sub>5</sub> O <sub>2</sub>                                                                      | 0.50           |
| 1 | 618.3319        | 618.3318         | <sup>0,2</sup> X <sub>2</sub>                                                                                                                                    | 0.16           |
| 1 | 621.2731        | 621.2730         | C <sub>3<math>\beta</math></sub> <sup>-</sup> -C <sub>2</sub> H <sub>5</sub> O                                                                                   | 0.16           |
| 1 | 621.3089        | 621.3093         | <sup>1,5</sup> A <sub>3<math>\beta</math></sub>                                                                                                                  | -0.64          |
| 1 | 633.2728        | 633.2729         | C <sub>3<math>\beta</math></sub> <sup>+</sup> -CH <sub>3</sub> O, C <sub>3<math>\alpha</math></sub> <sup>‡</sup> /Z <sub>4<math>\alpha</math></sub> <sup>"</sup> | -0.16          |
| 1 | 635.2886        | 635.2885         | C <sub>3<math>\beta</math></sub> <sup>-</sup> -CH <sub>3</sub> O, C <sub>3<math>\alpha</math></sub> /Z <sub>4<math>\alpha</math></sub> <sup>"</sup>              | 0.16           |
| 1 | 649.3040        | 649.3042         | B <sub>3<math>\beta</math></sub>                                                                                                                                 | -0.31          |
| 1 | 651.2829        | 651.2835         | C <sub>3<math>\beta</math></sub> <sup>-</sup> -CH <sub>3</sub>                                                                                                   | -0.92          |



| z | Exp. <i>m/z</i> | Theo. <i>m/z</i> | Assignment                                                                             | $\Delta$ , ppm |
|---|-----------------|------------------|----------------------------------------------------------------------------------------|----------------|
| 1 | 663.2839        | 663.2835         | B <sub>3<math>\alpha</math>'</sub> / <sup>1,5</sup> X <sub>4<math>\alpha</math>'</sub> | 0.60           |
| 1 | 665.2989        | 665.2991         | C <sub>3<math>\beta</math>'</sub>                                                      | -0.30          |
| 1 | 667.3112        | 667.3148         | C <sub>3<math>\beta</math></sub>                                                       | -5.39          |
| 1 | 679.2783        | 679.2784         | C <sub>3<math>\alpha</math>'</sub> / <sup>1,5</sup> X <sub>4<math>\alpha</math>'</sub> | -0.15          |
| 1 | 695.3087        | 695.3097         | Y <sub>4<math>\alpha</math>'</sub> / <sup>0,4</sup> A <sub>4<math>\alpha</math></sub>  | -1.44          |
| 2 | 700.8468        | 700.8470         | Y <sub>4<math>\alpha</math></sub>                                                      | -0.29          |
| 2 | 714.8453        | 714.8444         | <sup>1,5</sup> X <sub>3<math>\alpha</math></sub>                                       | 1.26           |
| 1 | 723.3408        | 723.3410         | <sup>1,3</sup> A <sub>4</sub>                                                          | -0.28          |
| 2 | 728.8606        | 728.8601         | <sup>0,2</sup> X <sub>3<math>\alpha</math></sub>                                       | 0.69           |
| 1 | 734.3793        | 734.3792         | Y <sub>3<math>\alpha</math>'</sub> /Z <sub>3<math>\beta</math></sub>                   | 0.14           |
| 1 | 750.3702        | 750.3741         | Y <sub>3<math>\alpha</math>'</sub> /Y <sub>3<math>\beta</math>'</sub>                  | -5.20          |
| 2 | 757.8521        | 757.8517         | C <sub>5</sub> /Z <sub>3<math>\beta</math></sub>                                       | 0.53           |
| 2 | 786.8855        | 786.8838         | Y <sub>4<math>\alpha</math>'</sub> /Z <sub>4<math>\alpha</math>'</sub>                 | 2.16           |
| 1 | 839.3894        | 839.3883         | C <sub>4</sub> /Z <sub>3<math>\alpha</math></sub>                                      | 1.31           |
| 1 | 855.3811        | 855.3832         | C <sub>4</sub> '/Y <sub>3<math>\alpha</math></sub>                                     | -2.46          |
| 1 | 857.4013        | 857.3989         | C <sub>4</sub> /Y <sub>3<math>\alpha</math></sub>                                      | 2.80           |
| 1 | 883.3739        | 883.3781         | C <sub>4</sub> '/ <sup>1,5</sup> X <sub>3<math>\alpha</math></sub>                     | -4.75          |
| 1 | 885.3902        | 885.3938         | C <sub>4</sub> / <sup>1,5</sup> X <sub>3<math>\alpha</math></sub>                      | -4.07          |
| 2 | 888.9343        | 888.9336         | Y <sub>5<math>\alpha</math>'</sub> /Z <sub>4<math>\alpha</math>'</sub>                 | 0.79           |
| 2 | 903.9388        | 903.9389         | Y <sub>3<math>\beta</math>'</sub>                                                      | -0.11          |
| 2 | 918.9462        | 918.9442         | <sup>1,5</sup> X <sub>3<math>\beta</math></sub>                                        | 2.18           |
| 2 | 933.4381        | 933.4408         | <sup>1,5</sup> A <sub>4</sub>                                                          | -2.89          |
| 2 | 956.4430        | 956.4435         | C <sub>4</sub> '                                                                       | -0.52          |
| 2 | 990.9826        | 990.9835         | Y <sub>5<math>\alpha</math>'</sub> /Z <sub>5<math>\alpha</math>'</sub>                 | -0.91          |
| 2 | 992.4792        | 992.4722         | <sup>3,5</sup> A <sub>5</sub>                                                          | 7.05           |
| 2 | 997.9890        | 997.9914         | Z <sub>4<math>\alpha</math>'</sub> , 4 $\alpha$ ', 4 $\beta$                           | -2.40          |
| 2 | 999.9860        | 999.9888         | Y <sub>5<math>\alpha</math>'</sub> /Y <sub>5<math>\alpha</math>'</sub>                 | -2.80          |
| 2 | 1004.9807       | 1004.9810        | Y <sub>4<math>\alpha</math>'</sub> , 4 $\alpha$ ', 4 $\beta$ '                         | -0.30          |
| 2 | 1014.4872       | 1014.4853        | <sup>2,5</sup> A <sub>5</sub>                                                          | 1.87           |
| 2 | 1020.9941       | 1020.9941        | <sup>1,5</sup> X <sub>4<math>\alpha</math>'</sub> , 4 $\alpha$ ', 4 $\beta$            | 0.00           |
| 1 | 1027.4994       | 1027.4932        | <sup>1,5</sup> A <sub>3<math>\alpha</math>'</sub>                                      | 6.03           |
| 1 | 1029.5128       | 1029.5088        | <sup>1,5</sup> A <sub>3<math>\alpha</math></sub>                                       | 3.89           |
| 2 | 1033.9962       | 1033.9908        | B <sub>5</sub> / <sup>0,4</sup> X <sub>5<math>\alpha</math>'</sub>                     | 5.22           |
| 2 | 1042.9988       | 1042.9961        | C <sub>5</sub> / <sup>0,4</sup> X <sub>5<math>\alpha</math>'</sub>                     | 2.59           |
| 2 | 1070.5182       | 1070.5172        | Y <sub>5</sub> / <sup>1,5</sup> A <sub>6</sub>                                         | 0.93           |
| 1 | 1075.5133       | 1075.5143        | C <sub>3<math>\alpha</math></sub>                                                      | -0.93          |
| 2 | 1079.00798      | 1079.0067        | C <sub>5</sub> '                                                                       | 1.19           |
| 2 | 1080.0137       | 1080.0145        | C <sub>5</sub>                                                                         | -0.74          |

| z | Exp. <i>m/z</i> | Theo. <i>m/z</i> | Assignment                                                                                                 | $\Delta$ , ppm |
|---|-----------------|------------------|------------------------------------------------------------------------------------------------------------|----------------|
| 2 | 1100.0396       | 1100.0412        | Z <sub>5<math>\alpha</math>'</sub> , 5 $\alpha'$ , 5 $\beta$                                               | -1.45          |
| 2 | 1108.0383       | 1108.0387        | Y <sub>5<math>\alpha</math>'</sub> , 5 $\alpha'$ , 5 $\beta$ <sup>‡</sup>                                  | -0.36          |
| 2 | 1115.0348       | 1115.0354        | <sup>3,5</sup> A <sub>6</sub>                                                                              | -0.54          |
| 1 | 1117.5256       | 1117.5249        | <sup>0,4</sup> A <sub>4</sub>                                                                              | 0.63           |
| 2 | 1123.0441       | 1123.0440        | <sup>1,5</sup> X <sub>5<math>\alpha</math>'</sub> , 5 $\alpha'$ , 5 $\beta$                                | 0.09           |
| 2 | 1145.0514       | 1145.0571        | <sup>2,5</sup> X <sub>5<math>\alpha</math>'</sub> , 5 $\alpha'$ , 5 $\beta$                                | -4.98          |
| 1 | 1145.5566       | 1145.5562        | <sup>3,5</sup> A <sub>4</sub>                                                                              | 0.35           |
| 2 | 1152.0640       | 1152.0649        | <sup>1,4</sup> X <sub>5<math>\alpha</math>'</sub> , 5 $\alpha'$ , 5 $\beta$                                | -0.78          |
| 2 | 1187.0847       | 1187.0853        | M <sup>•</sup> -C <sub>2</sub> H <sub>6</sub> O <sub>2</sub>                                               | -0.51          |
| 2 | 1195.0834       | 1195.0833        | M <sup>•</sup> -C <sub>2</sub> H <sub>5</sub> O                                                            | 0.08           |
| 2 | 1202.0919       | 1202.091         | M <sup>•</sup> -CH <sub>4</sub> O                                                                          | 0.75           |
| 2 | 1210.0890       | 1210.09          | M <sup>•</sup> -CH <sub>4</sub>                                                                            | -0.83          |
| 2 | 1218.1048       | 1218.1042        | M                                                                                                          | 0.49           |
| 1 | 1247.5889       | 1247.5879        | C <sub>4</sub> /Z <sub>3<math>\beta</math></sub>                                                           | 0.80           |
| 1 | 1316.6719       | 1316.6679        | Z <sub>3<math>\alpha</math>'</sub> -C <sub>2</sub> H <sub>5</sub> O                                        | 3.04           |
| 1 | 1330.6749       | 1330.6837        | Z <sub>3<math>\alpha</math>'</sub> -CH <sub>3</sub> O                                                      | -6.61          |
| 1 | 1344.6660       | 1344.6629        | Y <sub>3<math>\beta</math>'</sub> <sup>‡</sup> /Z <sub>4<math>\alpha'</math></sub> , 4 $\alpha''$          | 2.31           |
| 1 | 1346.6844       | 1346.6786        | Z <sub>3<math>\alpha</math>'</sub> -CH <sub>3</sub>                                                        | 4.31           |
| 1 | 1360.6887       | 1360.6942        | Z <sub>3<math>\alpha</math></sub>                                                                          | -4.04          |
| 1 | 1376.6934       | 1376.6891        | Y <sub>3<math>\alpha</math>'</sub> <sup>‡</sup>                                                            | 3.12           |
| 1 | 1406.7010       | 1406.6997        | <sup>1,5</sup> X <sub>3<math>\alpha</math></sub>                                                           | 0.92           |
| 1 | 1451.6898       | 1451.6876        | C <sub>4</sub> /Z <sub>4<math>\alpha''</math></sub> , 4 $\alpha'$ , 4 $\beta$                              | 1.52           |
| 1 | 1492.7115       | 1492.7142        | C <sub>5</sub> /Z <sub>3<math>\beta</math></sub>                                                           | -1.81          |
| 1 | 1495.6749       | 1495.6775        | C <sub>4</sub> <sup>‡</sup> / <sup>1,5</sup> X <sub>4<math>\alpha''</math></sub> , 4 $\alpha'$ , 4 $\beta$ | -1.74          |
| 1 | 1548.7663       | 1548.7626        | Y <sub>4<math>\alpha'</math>'</sub> <sup>‡</sup> /Z <sub>4<math>\alpha''</math></sub>                      | 2.39           |
| 1 | 1550.7785       | 1550.7783        | Y <sub>4<math>\alpha'</math>'</sub> /Z <sub>4<math>\alpha''</math></sub>                                   | 0.13           |
| 1 | 1566.7705       | 1566.7732        | Y <sub>4<math>\alpha'</math>'</sub> /Y <sub>4<math>\alpha''</math>'</sub> -2H                              | -1.69          |
| 1 | 1594.7623       | 1594.7682        | Y <sub>4<math>\alpha'</math>'</sub> <sup>‡</sup> / <sup>1,5</sup> X <sub>4<math>\alpha''</math></sub>      | -3.67          |
| 1 | 1624.7772       | 1624.7690        | C <sub>4</sub> /Z <sub>5</sub> -CH <sub>3</sub> O                                                          | 5.04           |
| 1 | 1655.7870       | 1655.7874        | C <sub>4</sub> /Z <sub>5</sub>                                                                             | -0.24          |
| 1 | 1671.7834       | 1671.7824        | C <sub>4</sub> <sup>‡</sup> /Y <sub>5</sub>                                                                | 0.63           |
| 1 | 1699.7776       | 1699.7772        | C <sub>4</sub> <sup>‡</sup> / <sup>1,5</sup> X <sub>5</sub>                                                | 0.24           |
| 1 | 1738.8824       | 1738.8832        | Z <sub>3<math>\beta</math>'</sub> -CH <sub>3</sub> O                                                       | -0.46          |
| 1 | 1754.8764       | 1754.8781        | Y <sub>5<math>\alpha'</math>'</sub> /Z <sub>4<math>\alpha''</math></sub>                                   | -0.97          |
| 1 | 1768.8931       | 1768.8937        | Z <sub>3<math>\beta</math></sub>                                                                           | -0.34          |
| 1 | 1784.8876       | 1784.8886        | Y <sub>3<math>\beta</math>'</sub> <sup>‡</sup>                                                             | -0.56          |
| 1 | 1814.9018       | 1814.8992        | <sup>1,5</sup> X <sub>3<math>\beta</math></sub>                                                            | 1.43           |
| 1 | 1845.9051       | 1845.9079        | <sup>1,5</sup> A <sub>4</sub>                                                                              | -1.52          |

| z | Exp. <i>m/z</i> | Theo. <i>m/z</i> | Assignment                                                                                                            | $\Delta$ , ppm |
|---|-----------------|------------------|-----------------------------------------------------------------------------------------------------------------------|----------------|
| 1 | 1859.8872       | 1859.8872        | C <sub>4</sub> <sup>•</sup> -CH <sub>3</sub> O                                                                        | 0.00           |
| 1 | 1875.8799       | 1875.8821        | C <sub>4</sub> <sup>±</sup> -CH <sub>3</sub>                                                                          | -1.17          |
| 1 | 1889.8982       | 1889.8977        | C <sub>4</sub> <sup>‡</sup>                                                                                           | 0.26           |
| 1 | 1928.9668       | 1928.9673        | Z <sub>4<math>\alpha</math></sub> <sup>•</sup> -C <sub>2</sub> H <sub>5</sub> O                                       | -0.26          |
| 1 | 1942.9793       | 1942.9830        | Z <sub>4<math>\alpha</math></sub> <sup>•</sup> -CH <sub>3</sub> O                                                     | -1.90          |
| 1 | 1958.9772       | 1958.9778        | Z <sub>4<math>\alpha</math></sub> <sup>•</sup> -CH <sub>3</sub>                                                       | -0.31          |
| 1 | 1972.9958       | 1972.9935        | Z <sub>4<math>\alpha</math>'</sub> <sup>•</sup> , 4 $\alpha$ ' <sup>•</sup> , 4 $\beta$ ' <sup>•</sup>                | 1.17           |
| 1 | 1988.9870       | 1988.9884        | Y <sub>4<math>\alpha</math>'</sub> <sup>•</sup> , 4 $\alpha$ ' <sup>•</sup> , 4 $\beta$ ' <sup>•</sup>                | -0.70          |
| 1 | 2019.0011       | 2018.9990        | <sup>1,5</sup> X <sub>4<math>\alpha</math>'</sub> <sup>•</sup> , 4 $\alpha$ ' <sup>•</sup> , 4 $\beta$ ' <sup>•</sup> | 1.04           |
| 1 | 2119.0337       | 2119.0292        | B <sub>5</sub>                                                                                                        | 2.12           |
| 1 | 2177.0843       | 2177.0933        | Z <sub>5<math>\alpha</math>'</sub> <sup>•</sup> , 5 $\alpha$ ' <sup>•</sup> , 5 $\beta$ ' <sup>•</sup>                | -4.13          |
| 1 | 2193.0907       | 2193.0882        | Y <sub>5<math>\alpha</math>'</sub> <sup>•</sup> , 5 $\alpha$ ' <sup>•</sup> , 5 $\beta$ ' <sup>•</sup>                | 1.16           |
| 1 | 2223.0972       | 2223.0987        | <sup>1,5</sup> X <sub>5<math>\alpha</math>'</sub> <sup>•</sup> , 5 $\alpha$ ' <sup>•</sup> , 5 $\beta$ ' <sup>•</sup> | -0.67          |
| 1 | 2413.2175       | 2413.2192        | M                                                                                                                     | -0.70          |

**Table S2.** List of assigned fragments by EED MS/MS of deuterio-reduced and permethylated Man<sub>9</sub>GlcNAc<sub>2</sub> ([M+2Na]<sup>2+</sup> at *m/z* 1218.1042), acquired on the FTICR MS instrument (spectrum shown in Figure 2b). All fragments are sodium adducts unless labeled otherwise. Multiple assignments are separated by commas; the double dagger symbol (‡) indicates that the fragment has two fewer hydrogens than the canonical structures; the double prime symbol (") indicates that the fragment has two more hydrogens than the canonical structure; the dot symbol (·) indicates a radical.

| <i>z</i> | Exp. <i>m/z</i> | Theo. <i>m/z</i> | Assignment                                                                | Δ, ppm |
|----------|-----------------|------------------|---------------------------------------------------------------------------|--------|
| 1        | 211.0936        | 211.0941         | B <sub>1</sub> ·-CH <sub>3</sub> O                                        | -2.20  |
| 1        | 213.0728        | 213.0734         | C <sub>1</sub> ·-C <sub>2</sub> H <sub>5</sub> O                          | -2.86  |
| 1        | 227.0886        | 227.0890         | C <sub>1</sub> ·-CH <sub>3</sub> O                                        | -1.87  |
| 1        | 241.1042        | 241.1046         | B <sub>1</sub>                                                            | -1.72  |
| 1        | 243.0836        | 243.0839         | C <sup>‡</sup> /Y (Hex)                                                   | -1.40  |
| 1        | 257.0993        | 257.0996         | C <sub>1</sub> <sup>‡</sup>                                               | -1.16  |
| 1        | 269.1579        | 269.1582         | Z <sub>1</sub> ·-CH <sub>3</sub> O                                        | -1.13  |
| 1        | 285.1530        | 285.1531         | Z <sub>1</sub> ·-CH <sub>3</sub>                                          | -0.50  |
| 1        | 296.1102        | 296.1105         | B <sub>5</sub> <sup>/1,5</sup> X <sub>1</sub>                             | -0.77  |
| 1        | 299.1686        | 299.1687         | Z <sub>1</sub>                                                            | -0.61  |
| 1        | 315.1413        | 315.1414         | <sup>1,3</sup> A <sub>2</sub>                                             | -0.39  |
| 1        | 315.1636        | 315.1637         | Y <sub>1</sub> <sup>‡</sup>                                               | -0.28  |
| 1        | 317.1792        | 317.1793         | Y <sub>1</sub>                                                            | -0.25  |
| 1        | 329.1207        | 329.1207         | C <sub>2</sub> <sup>‡/1,4</sup> X <sub>5</sub>                            | 0.09   |
| 1        | 345.1742        | 345.1742         | <sup>1,5</sup> X <sub>1</sub>                                             | 0.00   |
| 1        | 371.1677        | 371.1676         | B <sub>2β</sub> <sup>/0,4</sup> X <sub>5β</sub>                           | 0.11   |
| 1        | 379.1340        | 379.1344         | <sup>1,4</sup> A <sub>2</sub> <sup>‡</sup> (2Na-H)                        | -0.95  |
| 1        | 399.1629        | 399.1626         | C <sub>2</sub> <sup>‡</sup> -C <sub>2</sub> H <sub>5</sub> O <sub>2</sub> | 0.66   |
| 1        | 401.1785        | 401.1781         | C <sub>2</sub> ·-C <sub>2</sub> H <sub>5</sub> O <sub>2</sub>             | 1.06   |
| 1        | 413.1780        | 413.1782         | B <sub>3β</sub> /Z <sub>5β</sub>                                          | -0.61  |
| 1        | 415.1941        | 415.1939         | <sup>1,5</sup> A <sub>2</sub> <sup>‡</sup>                                | 0.69   |
| 1        | 417.1735        | 417.1732         | C <sub>2</sub> ·-C <sub>2</sub> H <sub>5</sub> O                          | 0.81   |
| 1        | 417.2095        | 417.2095         | <sup>1,5</sup> A <sub>2</sub>                                             | 0.04   |
| 1        | 429.1737        | 429.1731         | C <sub>2</sub> <sup>‡</sup> -CH <sub>3</sub> O                            | 1.29   |
| 1        | 431.1890        | 431.1888         | C <sub>2</sub> ·-CH <sub>3</sub> O                                        | 0.63   |
| 1        | 445.2046        | 445.2044         | B <sub>2</sub>                                                            | 0.43   |
| 1        | 447.1840        | 447.1837         | C <sup>‡</sup> <sub>3β</sub> /Y <sub>5β</sub>                             | 0.60   |
| 1        | 461.1997        | 461.1993         | C <sub>2</sub> <sup>‡</sup>                                               | 0.80   |
| 1        | 463.2156        | 463.2150         | C <sub>2</sub>                                                            | 1.22   |
| 1        | 475.1788        | 475.1786         | C <sub>3β</sub> <sup>‡/1,5</sup> X <sub>5β</sub>                          | 0.32   |

| z | Exp. m/z | Theo. m/z | Assignment                                                                                                                                             | $\Delta$ , ppm |
|---|----------|-----------|--------------------------------------------------------------------------------------------------------------------------------------------------------|----------------|
| 1 | 484.2741 | 484.2740  | Z <sub>2</sub> <sup>-</sup> -C <sub>2</sub> H <sub>5</sub> O                                                                                           | 0.36           |
| 1 | 485.1974 | 485.1993  | Z <sub>5<math>\beta</math></sub> / <sup>1,3</sup> A <sub>3<math>\beta</math></sub> <sup>‡</sup>                                                        | -3.94          |
| 1 | 500.2693 | 500.2688  | Z <sub>2</sub> <sup>-</sup> -C <sub>2</sub> H <sub>5</sub> O                                                                                           | 1.02           |
| 1 | 502.2850 | 502.2845  | Z <sub>2</sub> <sup>-*</sup> -C <sub>2</sub> H <sub>5</sub> O                                                                                          | 0.97           |
| 1 | 505.2262 | 505.2255  | <sup>0,4</sup> A <sub>3<math>\alpha'</math></sub>                                                                                                      | 1.27           |
| 1 | 514.2851 | 514.2845  | Z <sub>2</sub> <sup>-</sup> -CH <sub>3</sub> O                                                                                                         | 1.04           |
| 1 | 519.2417 | 519.2412  | <sup>1,3</sup> A <sub>3<math>\beta</math></sub> , 3 $\alpha''$                                                                                         | 0.87           |
| 1 | 527.2080 | 527.2076  | <sup>0,4</sup> A <sub>3<math>\alpha'</math></sub> <sup>‡</sup> (2Na-H)                                                                                 | 0.82           |
| 1 | 530.2799 | 530.2794  | Z <sub>2</sub> <sup>-</sup> -CH <sub>3</sub>                                                                                                           | 0.93           |
| 1 | 533.2575 | 533.2568  | <sup>3,5</sup> A <sub>3<math>\alpha'</math></sub>                                                                                                      | 1.15           |
| 1 | 544.2956 | 544.2951  | Z <sub>2</sub>                                                                                                                                         | 1.04           |
| 1 | 547.2364 | 547.2361  | <sup>0,3</sup> A <sub>3<math>\alpha'</math></sub> <sup>‡</sup>                                                                                         | 0.53           |
| 1 | 560.2908 | 560.2900  | Y <sub>2</sub> <sup>‡</sup>                                                                                                                            | 1.44           |
| 1 | 561.2528 | 561.2518  | <sup>1,4</sup> A <sub>3<math>\beta</math></sub> , 3 $\alpha''$ <sup>‡</sup>                                                                            | 1.88           |
| 1 | 562.3061 | 562.3056  | Y <sub>2</sub>                                                                                                                                         | 0.80           |
| 1 | 575.2685 | 575.2674  | B <sub>3<math>\beta</math></sub> / <sup>0,4</sup> X <sub>5<math>\beta</math></sub>                                                                     | 1.86           |
| 1 | 583.2344 | 583.2338  | <sup>1,4</sup> A <sub>3<math>\beta</math></sub> , 3 $\alpha''$ <sup>‡</sup> (2Na-H)                                                                    | 1.10           |
| 1 | 590.3013 | 590.3005  | <sup>1,5</sup> X <sub>2</sub>                                                                                                                          | 1.31           |
| 1 | 605.2783 | 605.2779  | C <sub>3<math>\beta</math></sub> <sup>-</sup> -C <sub>2</sub> H <sub>5</sub> O <sub>2</sub>                                                            | 0.67           |
| 1 | 618.3313 | 618.3318  | <sup>0,2</sup> X <sub>2</sub>                                                                                                                          | -0.88          |
| 1 | 619.2940 | 619.2936  | <sup>1,5</sup> A <sub>3<math>\beta'</math></sub> <sup>‡</sup>                                                                                          | 0.59           |
| 1 | 621.2746 | 621.2730  | C <sub>3<math>\beta</math></sub> <sup>-</sup> -C <sub>2</sub> H <sub>5</sub> O                                                                         | 2.61           |
| 1 | 621.3096 | 621.3093  | <sup>1,5</sup> A <sub>3<math>\beta</math></sub>                                                                                                        | 0.55           |
| 1 | 633.2742 | 633.2729  | C <sub>3<math>\beta</math></sub> <sup>‡</sup> -CH <sub>3</sub> O, C <sub>3<math>\alpha'</math></sub> <sup>‡</sup> /Z <sub>4<math>\alpha''</math></sub> | 2.02           |
| 1 | 635.2894 | 635.2885  | C <sub>3<math>\beta</math></sub> <sup>-</sup> -CH <sub>3</sub> O, C <sub>3<math>\alpha'</math></sub> /Z <sub>4<math>\alpha''</math></sub>              | 1.29           |
| 1 | 649.3046 | 649.3042  | B <sub>3<math>\beta</math></sub>                                                                                                                       | 0.60           |
| 1 | 651.2831 | 651.2835  | C <sub>3<math>\beta</math></sub> -CH <sub>3</sub>                                                                                                      | -0.50          |
| 1 | 665.3000 | 665.2991  | C <sub>3<math>\beta</math></sub> <sup>‡</sup>                                                                                                          | 1.27           |
| 1 | 667.3168 | 667.3148  | C <sub>3<math>\beta</math></sub>                                                                                                                       | 3.08           |
| 1 | 717.2924 | 717.2922  | <sup>0,4</sup> A <sub>4<math>\alpha</math></sub> /Y <sub>4<math>\alpha''</math></sub> (2Na-H)                                                          | 0.33           |
| 1 | 723.3423 | 723.3410  | <sup>1,3</sup> A <sub>4</sub>                                                                                                                          | 1.88           |
| 1 | 734.3805 | 734.3792  | Y <sub>3<math>\alpha</math></sub> /Z <sub>3<math>\beta</math></sub>                                                                                    | 1.72           |
| 1 | 809.3792 | 809.3778  | Y <sub>5<math>\alpha</math></sub> / <sup>1,5</sup> A <sub>3<math>\alpha'</math></sub> <sup>‡</sup>                                                     | 1.77           |
| 1 | 839.3889 | 839.3883  | C <sub>4</sub> /Z <sub>3<math>\alpha</math></sub>                                                                                                      | 0.72           |
| 1 | 883.3781 | 883.3781  | C <sub>4</sub> <sup>‡</sup> / <sup>1,5</sup> X <sub>3<math>\alpha</math></sub>                                                                         | -0.08          |
| 2 | 888.9358 | 888.9336  | Y <sub>5<math>\alpha</math></sub> /Z <sub>4<math>\alpha''</math></sub>                                                                                 | 2.40           |
| 2 | 895.9236 | 895.9233  | Y <sub>5<math>\alpha</math></sub> /Y <sub>4<math>\alpha''</math></sub> <sup>‡</sup>                                                                    | 0.32           |
| 2 | 918.9447 | 918.9442  | <sup>1,5</sup> X <sub>3<math>\beta</math></sub>                                                                                                        | 0.51           |
| 1 | 921.3930 | 921.3919  | <sup>0,4</sup> A <sub>4<math>\alpha</math></sub> /Y <sub>5<math>\alpha''</math></sub> (2Na-H)                                                          | 1.16           |

| z | Exp. <i>m/z</i> | Theo. <i>m/z</i> | Assignment                                 | $\Delta$ , ppm |
|---|-----------------|------------------|--------------------------------------------|----------------|
| 2 | 934.4513        | 934.4486         | $^{1,5}A_4$                                | 2.96           |
| 1 | 938.4814        | 938.4790         | $Y_{3\alpha}/Z_{4\beta}$                   | 2.63           |
| 2 | 956.4448        | 956.4435         | $C_4^\ddagger$                             | 1.31           |
| 2 | 990.9859        | 990.9835         | $Y_{5\alpha'}/Z_{5\alpha''}$               | 2.40           |
| 2 | 1004.9823       | 1004.9810        | $Y_{4\alpha''}, 4\alpha', 4\beta^\ddagger$ | 1.27           |
| 2 | 1014.4878       | 1014.4853        | $^{2,5}A_5$                                | 2.45           |
| 2 | 1020.9955       | 1020.9941        | $^{1,5}X_{4\alpha''}, 4\alpha', 4\beta$    | 1.41           |
| 1 | 1027.4955       | 1027.4932        | $^{1,5}A_{3\alpha}^\ddagger$               | 2.21           |
| 1 | 1029.5104       | 1029.5088        | $^{1,5}A_{3\alpha}$                        | 1.50           |
| 1 | 1042.5229       | 1042.5263        | $C_5^{0,4}X_{5\alpha''}$                   | -3.27          |
| 1 | 1043.4882       | 1043.4881        | $C_{3\alpha} \cdot -CH_3O$                 | 0.07           |
| 2 | 1057.0163       | 1057.0117        | $^{1,5}A_5$                                | 4.28           |
| 2 | 1058.0026       | 1058.0014        | $C_5^\ddagger \cdot -C_2H_5O$              | 1.17           |
| 1 | 1073.5022       | 1073.4987        | $C_{3\alpha}^\ddagger$                     | 3.29           |
| 1 | 1075.5136       | 1075.5143        | $C_{3\alpha}$                              | -0.64          |
| 2 | 1079.0080       | 1079.0067        | $C_5^\ddagger$                             | 1.19           |
| 2 | 1100.0433       | 1100.0412        | $Z_{5\alpha''}, 5\alpha', 5\beta$          | 1.86           |
| 2 | 1108.0406       | 1108.0378        | $Y_{5\alpha''}, 5\alpha', 5\beta^\ddagger$ | 2.49           |
| 1 | 1117.5251       | 1117.5249        | $^{0,4}A_4$                                | 0.17           |
| 2 | 1123.0454       | 1123.0440        | $^{1,5}X_{5\alpha''}, 5\alpha', 5\beta$    | 1.25           |
| 2 | 1137.0610       | 1137.0596        | $^{0,2}X_{5\alpha''}, 5\alpha', 5\beta$    | 1.24           |
| 1 | 1139.5079       | 1139.5069        | $^{0,4}A_4(2Na-H)$                         | 0.87           |
| 1 | 1145.5582       | 1145.5562        | $^{3,5}A_4$                                | 1.80           |
| 2 | 1152.0680       | 1152.0649        | $^{1,4}X_{5\alpha''}, 5\alpha', 5\beta$    | 2.65           |
| 2 | 1167.0704       | 1167.0702        | $^{3,5}X_{5\alpha''}, 5\alpha', 5\beta$    | 0.19           |
| 2 | 1180.5843       | 1180.5819        | $M-C_3H_7O_2$                              | 2.05           |
| 2 | 1187.0885       | 1187.0853        | $M-C_2H_6O_2$                              | 2.63           |
| 2 | 1195.0850       | 1195.0833        | $M-C_2H_5O$                                | 1.43           |
| 2 | 1202.0923       | 1202.091         | $M-CH_4O$                                  | 0.98           |
| 2 | 1210.0905       | 1210.09          | $M-CH_4$                                   | 0.55           |
| 2 | 1218.1050       | 1218.1042        | $M$                                        | 0.61           |
| 1 | 1247.5898       | 1247.5879        | $C_4/Z_{3\beta}$                           | 1.53           |
| 1 | 1330.6900       | 1330.6836        | $Z_{3\alpha} \cdot -CH_3O$                 | 4.79           |
| 1 | 1360.7014       | 1360.6942        | $Z_{3\alpha}$                              | 5.29           |
| 1 | 1376.6953       | 1376.6891        | $Y_{3\alpha}^\ddagger$                     | 4.54           |
| 1 | 1406.7010       | 1406.6996        | $^{1,5}X_{3\alpha}$                        | 0.98           |
| 1 | 1462.7046       | 1462.7036        | $Y_{3\beta}/^{1,5}A_5^\ddagger$            | 0.65           |
| 1 | 1699.7707       | 1699.7772        | $C_4^\ddagger/^{1,5}X_{4\alpha}$           | -3.82          |
| 1 | 1738.8873       | 1738.8832        | $Z_{3\beta} \cdot -CH_3O$                  | 2.38           |

| z | Exp. <i>m/z</i> | Theo. <i>m/z</i> | Assignment                                                                                     | $\Delta$ , ppm |
|---|-----------------|------------------|------------------------------------------------------------------------------------------------|----------------|
| 1 | 1754.8776       | 1754.8781        | Y <sub>5<math>\alpha'</math></sub> /Z <sub>4<math>\alpha''</math></sub>                        | -0.27          |
| 1 | 1768.8981       | 1768.8937        | Z <sub>3<math>\beta</math></sub>                                                               | 2.49           |
| 1 | 1784.8851       | 1784.8886        | Y <sub>3<math>\beta</math></sub> <sup>‡</sup>                                                  | -1.97          |
| 1 | 1814.8979       | 1814.8992        | <sup>1,5</sup> X <sub>3<math>\beta</math></sub>                                                | -0.70          |
| 1 | 1845.9077       | 1845.9079        | <sup>1,5</sup> A <sub>5</sub>                                                                  | -0.10          |
| 1 | 1875.8810       | 1875.8821        | C <sub>4</sub> <sup>‡</sup> -CH <sub>3</sub>                                                   | -0.61          |
| 1 | 1889.8974       | 1889.8977        | C <sub>4</sub> <sup>‡</sup>                                                                    | -0.18          |
| 1 | 1928.9689       | 1928.9672        | Z <sub>4<math>\alpha''</math></sub> , 4 $\alpha'$ , 4 $\beta$ -C <sub>2</sub> H <sub>5</sub> O | 0.87           |
| 1 | 1942.9802       | 1942.9829        | Z <sub>4<math>\alpha''</math></sub> , 4 $\alpha'$ , 4 $\beta$ -CH <sub>3</sub> O               | -1.41          |
| 1 | 1958.9777       | 1958.9778        | Y <sub>5<math>\alpha'</math></sub> /Z <sub>5<math>\alpha''</math></sub>                        | -0.05          |
| 1 | 1972.9840       | 1972.9935        | Z <sub>4<math>\alpha''</math></sub> , 4 $\alpha'$ , 4 $\beta$                                  | -4.81          |
| 1 | 2019.0035       | 2018.9990        | <sup>1,5</sup> X <sub>4<math>\alpha''</math></sub> , 4 $\alpha'$ , 4 $\beta$                   | 2.26           |
| 1 | 2119.0266       | 2119.0292        | B <sub>5</sub>                                                                                 | -1.20          |
| 1 | 2223.0984       | 2223.0987        | <sup>1,5</sup> X <sub>5<math>\alpha''</math></sub> , 5 $\alpha'$ , 5 $\beta$                   | -0.15          |
| 1 | 2337.1693       | 2337.1668        | M-C <sub>3</sub> H <sub>8</sub> O <sub>2</sub>                                                 | 1.05           |
| 1 | 2381.1948       | 2381.1930        | M-CH <sub>4</sub> O                                                                            | 0.73           |
| 1 | 2413.2185       | 2413.2192        | M                                                                                              | -0.30          |

**Table S3.** List of assigned fragments by CID-EED MS<sup>3</sup> of the <sup>0,4</sup>A<sub>4</sub> ion from deuterio-reduced and permethylated Man<sub>9</sub>GlcNAc<sub>2</sub> at *m/z* 1117.5259, acquired on the QE-Omnitrap platform (spectrum shown in Figure 4b). All fragments are sodium adducts unless labeled otherwise. Multiple assignments are separated by commas; the double dagger symbol (‡) indicates that the fragment has two fewer hydrogens than the canonical structures; the double prime symbol (") indicates that the fragment has two more hydrogens than the canonical structure; the dot symbol (·) indicates a radical.

| <i>z</i> | Exp. <i>m/z</i> | Theo. <i>m/z</i> | Assignment                                                                                    | Δ, ppm |
|----------|-----------------|------------------|-----------------------------------------------------------------------------------------------|--------|
| 1        | 227.0893        | 227.0890         | C <sub>1</sub> <sup>·</sup> -CH <sub>3</sub> O                                                | 1.35   |
| 1        | 243.0844        | 243.0839         | C <sup>‡</sup> /Y (Hex)                                                                       | 1.88   |
| 1        | 255.0841        | 255.0839         | Y <sub>4α'</sub> /Z <sub>4α''</sub> / <sup>0,4</sup> A <sub>4</sub>                           | 0.55   |
| 1        | 259.1162        | 259.1152         | C <sub>1</sub>                                                                                | 3.73   |
| 1        | 315.1053        | 315.1050         | C <sub>2</sub> <sup>‡/2,5</sup> X <sub>5</sub>                                                | 0.73   |
| 1        | 315.1416        | 315.1414         | <sup>1,3</sup> A <sub>2</sub>                                                                 | 0.57   |
| 1        | 343.1369        | 343.1363         | B <sub>2</sub> / <sup>3,5</sup> X <sub>5</sub>                                                | 1.51   |
| 1        | 417.1737        | 417.1732         | C <sub>2</sub> <sup>·</sup> -C <sub>2</sub> H <sub>5</sub> O                                  | 1.26   |
| 1        | 431.1890        | 431.1888         | C <sub>2</sub> <sup>·</sup> -CH <sub>3</sub> O                                                | 0.59   |
| 1        | 443.1902        | 443.1888         | B <sub>2</sub> <sup>‡</sup>                                                                   | 3.32   |
| 1        | 445.2045        | 445.2044         | B <sub>2</sub>                                                                                | 0.29   |
| 1        | 459.1841        | 459.1837         | Y <sub>5α'</sub> /Z <sub>4α''</sub> / <sup>0,4</sup> A <sub>4</sub>                           | 0.83   |
| 1        | 461.1997        | 461.1993         | C <sub>2</sub> <sup>‡</sup>                                                                   | 0.78   |
| 1        | 463.2153        | 463.2150         | C <sub>2</sub>                                                                                | 0.60   |
| 1        | 505.2262        | 505.2255         | <sup>0,4</sup> A <sub>3α'</sub>                                                               | 1.22   |
| 1        | 519.2413        | 519.2412         | <sup>1,3</sup> A <sub>3α''</sub>                                                              | 0.23   |
| 1        | 533.2575        | 533.2568         | <sup>3,5</sup> A <sub>3α'</sub>                                                               | 1.30   |
| 1        | 633.2760        | 633.2768         | Z <sub>4α'</sub> <sup>·</sup> -C <sub>2</sub> H <sub>5</sub> O/ <sup>0,4</sup> A <sub>4</sub> | -1.38  |
| 1        | 635.2889        | 635.2885         | C <sub>3α</sub> /Z <sub>4α''</sub>                                                            | 0.57   |
| 1        | 647.2894        | 647.2926         | Z <sub>4α'</sub> <sup>·</sup> -CH <sub>3</sub> O/ <sup>0,4</sup> A <sub>4</sub>               | -4.98  |
| 1        | 663.2847        | 663.2875         | Y <sub>5α'</sub> /Z <sub>5α''</sub> / <sup>0,4</sup> A <sub>4</sub>                           | -4.25  |
| 1        | 677.2997        | 677.3031         | Z <sub>4α</sub> / <sup>0,4</sup> A <sub>4</sub>                                               | -5.04  |
| 1        | 693.2953        | 693.2981         | Y <sub>4α</sub> <sup>‡</sup> / <sup>0,4</sup> A <sub>4</sub>                                  | -4.04  |
| 1        | 695.3094        | 695.3137         | Y <sub>4α</sub> / <sup>0,4</sup> A <sub>4</sub>                                               | -6.23  |
| 1        | 723.3057        | 723.3086         | <sup>1,5</sup> X <sub>4α</sub> / <sup>0,4</sup> A <sub>4</sub>                                | -3.99  |
| 1        | 781.3448        | 781.3465         | Y <sub>5α</sub> <sup>‡</sup> / <sup>0,2</sup> A <sub>3</sub>                                  | -2.06  |
| 1        | 897.3945        | 897.3978         | Y <sub>5α</sub> <sup>‡</sup> / <sup>0,4</sup> A <sub>4</sub>                                  | -3.70  |
| 1        | 927.4044        | 927.4084         | <sup>1,5</sup> X <sub>5α</sub> / <sup>0,4</sup> A <sub>4</sub>                                | -4.26  |
| 1        | 955.4356        | 955.4397         | <sup>0,2</sup> X <sub>5α</sub> / <sup>0,4</sup> A <sub>4</sub>                                | -4.25  |
| 1        | 985.4462        | 985.4503         | <sup>1,4</sup> X <sub>5α</sub> / <sup>0,4</sup> A <sub>4</sub>                                | -4.15  |



| <i>z</i> | Exp. <i>m/z</i> | Theo. <i>m/z</i> | Assignment | $\Delta$ , ppm |
|----------|-----------------|------------------|------------|----------------|
| 1        | 1117.5259       | 1117.5289        | M          | -2.68          |

**Table S4.** List of assigned fragments by CID-EED MS<sup>3</sup> of the B<sub>3β</sub> ion from deuterio-reduced and permethylated Man<sub>9</sub>GlcNAc<sub>2</sub> at *m/z* 649.3046, acquired on the QE-Omnitrap platform (spectrum shown in Figure 4c). All fragments are sodium adducts unless labeled otherwise. Multiple assignments are separated by commas; the double dagger symbol (‡) indicates that the fragment has two fewer hydrogens than the canonical structures; the double prime symbol (") indicates that the fragment has two more hydrogens than the canonical structure; the dot symbol (·) indicates a radical.

| <i>z</i> | Exp. <i>m/z</i> | Theo. <i>m/z</i> | Assignment                                                                                  | Δ, ppm |
|----------|-----------------|------------------|---------------------------------------------------------------------------------------------|--------|
| 1        | 225.0733        | 225.0734         | C <sub>1</sub> <sup>‡</sup> -CH <sub>3</sub> O                                              | -0.44  |
| 1        | 227.0890        | 227.0890         | C <sub>1</sub> <sup>·</sup> -CH <sub>3</sub> O                                              | 0.00   |
| 1        | 241.1046        | 241.1046         | B <sub>1</sub>                                                                              | 0.00   |
| 1        | 243.0838        | 243.0839         | C <sup>‡</sup> /Y (Hex)                                                                     | -0.41  |
| 1        | 255.0838        | 255.0839         | <sup>1,5</sup> X <sub>4</sub> /B <sub>3β</sub>                                              | -0.39  |
| 1        | 257.0993        | 257.0996         | C <sub>1</sub> <sup>‡</sup>                                                                 | -1.17  |
| 1        | 259.1153        | 259.1152         | C <sub>1</sub>                                                                              | 0.39   |
| 1        | 311.1098        | 311.1101         | <sup>1,4</sup> X <sub>2</sub> <sup>‡</sup>                                                  | -0.96  |
| 1        | 313.1256        | 313.1258         | <sup>1,3</sup> A <sub>2</sub> <sup>‡</sup>                                                  | -0.64  |
| 1        | 315.1415        | 315.1414         | <sup>1,3</sup> A <sub>2</sub>                                                               | 0.32   |
| 1        | 345.1521        | 345.1520         | C <sub>2β</sub> / <sup>0,3</sup> X <sub>5β</sub>                                            | 0.29   |
| 1        | 353.1568        | 353.1571         | Z <sub>5β</sub> <sup>·</sup> -C <sub>2</sub> H <sub>5</sub> O <sub>2</sub> /B <sub>3β</sub> | -0.85  |
| 1        | 361.1468        | 361.1469         | C <sub>2β</sub> / <sup>3,5</sup> X <sub>5β</sub>                                            | -0.28  |
| 1        | 369.1513        | 369.1519         | Z <sub>5β</sub> <sup>·</sup> -C <sub>2</sub> H <sub>5</sub> O/B <sub>3β</sub>               | -1.63  |
| 1        | 383.1676        | 383.1676         | Z <sub>5β</sub> / <sup>1,5</sup> A <sub>3</sub> <sup>‡</sup>                                | 0.00   |
| 1        | 385.1468        | 385.1469         | Z <sub>5β</sub> <sup>·</sup> -CH <sub>3</sub> O/B <sub>3β</sub>                             | -0.26  |
| 1        | 399.1624        | 399.1625         | Z <sub>5β</sub> <sup>·</sup> -CH <sub>3</sub> /B <sub>3β</sub>                              | -0.25  |
| 1        | 413.1782        | 413.1782         | Z <sub>5β</sub> /B <sub>3β</sub>                                                            | 0.00   |
| 1        | 415.1939        | 415.1939         | <sup>1,5</sup> A <sub>2</sub> <sup>‡</sup>                                                  | 0.00   |
| 1        | 429.1733        | 429.1731         | Y <sub>5β</sub> <sup>‡</sup> /B <sub>3β</sub>                                               | 0.47   |
| 1        | 431.1887        | 431.1887         | Y <sub>5β</sub> /B <sub>3β</sub>                                                            | 0.00   |
| 1        | 445.2043        | 445.2044         | B <sub>2</sub>                                                                              | -0.22  |
| 1        | 459.1838        | 459.1836         | <sup>1,5</sup> X <sub>5β</sub> /B <sub>3β</sub>                                             | 0.44   |
| 1        | 461.1999        | 461.1993         | C <sub>2</sub> <sup>‡</sup>                                                                 | 1.30   |
| 1        | 463.2153        | 463.2150         | C <sub>2</sub>                                                                              | 0.65   |
| 1        | 487.2149        | 487.2149         | <sup>0,2</sup> X <sub>5β</sub> /B <sub>3β</sub>                                             | 0.00   |
| 1        | 515.2094        | 515.2099         | <sup>1,4</sup> X <sub>5β</sub> <sup>‡</sup> /B <sub>3β</sub>                                | -0.97  |
| 1        | 517.2259        | 517.2255         | <sup>1,3</sup> A <sub>3</sub> <sup>‡</sup>                                                  | 0.77   |
| 1        | 519.2419        | 519.2412         | <sup>1,3</sup> A <sub>3</sub>                                                               | 1.35   |
| 1        | 573.2516        | 573.2517         | M-C <sub>3</sub> H <sub>7</sub> O <sub>2</sub>                                              | -0.17  |

| <i>z</i> | Exp. <i>m/z</i> | Theo. <i>m/z</i> | Assignment                                     | $\Delta$ , ppm |
|----------|-----------------|------------------|------------------------------------------------|----------------|
| 1        | 587.2669        | 587.2674         | M-C <sub>2</sub> H <sub>5</sub> O <sub>2</sub> | -0.85          |
| 1        | 603.2614        | 603.2624         | M-C <sub>2</sub> H <sub>5</sub> O              | -1.66          |
| 1        | 617.2783        | 617.2780         | M-CH <sub>3</sub> O                            | 0.49           |
| 1        | 649.3041        | 649.3042         | M                                              | -0.15          |

**Table S5.** List of assigned fragments by CID-EED MS<sup>3</sup> of the Y<sub>3β</sub><sup>2+</sup> ion from deuterio-reduced and permethylated Man<sub>9</sub>GlcNAc<sub>2</sub> at *m/z* 904.9469, acquired on QE-Omnitrap MS (spectrum shown in Figure S1). All fragments are sodium adducts unless labeled otherwise. Multiple assignments are separated by commas; the double dagger symbol (‡) indicates that the fragment has two fewer hydrogens than the canonical structures; the double prime symbol (") indicates that the fragment has two more hydrogens than the canonical structure; the dot symbol (·) indicates a radical.

| <i>z</i> | Exp. <i>m/z</i> | Theo. <i>m/z</i> | Assignment                                                     | Δ, ppm |
|----------|-----------------|------------------|----------------------------------------------------------------|--------|
| 1        | 227.0889        | 227.0890         | C <sub>1α</sub> ·-OCH <sub>3</sub>                             | -0.44  |
| 1        | 241.1045        | 241.1046         | B <sub>1α</sub>                                                | -0.41  |
| 1        | 255.1424        | 255.1425         | Z <sub>1</sub> ·-OC <sub>2</sub> H <sub>5</sub>                | -0.39  |
| 1        | 257.0994        | 257.0996         | C <sub>1α</sub> ‡                                              | -0.78  |
| 1        | 259.1145        | 259.1152         | C <sub>1α</sub>                                                | -2.70  |
| 1        | 269.1580        | 269.1582         | Z <sub>1</sub> ·-OCH <sub>3</sub>                              | -0.74  |
| 1        | 285.1529        | 285.1531         | Z <sub>1</sub> ·-CH <sub>3</sub>                               | -0.70  |
| 1        | 299.1685        | 299.1687         | Z <sub>1</sub>                                                 | -0.67  |
| 1        | 315.1411        | 315.1414         | <sup>3,5</sup> A <sub>3</sub>                                  | -0.95  |
| 1        | 317.1792        | 317.1793         | Y <sub>1</sub>                                                 | -0.32  |
| 1        | 339.1609        | 339.1613         | Y <sub>1</sub> (2Na-H)                                         | -1.18  |
| 1        | 345.1741        | 345.1742         | <sup>1,5</sup> X <sub>1</sub>                                  | -0.29  |
| 1        | 385.1831        | 385.1830         | B <sub>2α</sub> ·-O <sub>2</sub> C <sub>2</sub> H <sub>5</sub> | 0.26   |
| 1        | 386.2004        | 386.2006         | <sup>1,5</sup> A <sub>2α</sub> -OCH <sub>3</sub>               | -0.52  |
| 1        | 379.1338        | 379.1340         | <sup>1,4</sup> A <sub>2α</sub> ‡(2Na-H)                        | -0.53  |
| 1        | 401.1782        | 401.1782         | C <sub>2α</sub> ·-O <sub>2</sub> C <sub>2</sub> H <sub>5</sub> | 0.00   |
| 1        | 414.2325        | 414.2321         | <sup>0,2</sup> X <sub>1</sub>                                  | 0.97   |
| 1        | 417.2090        | 417.2095         | <sup>1,5</sup> A <sub>2α</sub>                                 | -1.20  |
| 1        | 431.1887        | 431.1888         | C <sub>2α</sub> ·-OCH <sub>3</sub>                             | -0.23  |
| 1        | 445.2043        | 445.2044         | B <sub>2α</sub>                                                | -0.22  |
| 1        | 461.1992        | 461.1994         | C <sub>2α</sub> ‡                                              | -0.43  |
| 1        | 463.2145        | 463.2150         | C <sub>2α</sub>                                                | -1.08  |
| 1        | 500.2684        | 500.2689         | Z <sub>2</sub> ·-OC <sub>2</sub> H <sub>5</sub>                | -1.00  |
| 1        | 505.2251        | 505.2255         | <sup>0,4</sup> A <sub>3α</sub>                                 | -0.79  |
| 1        | 514.2845        | 514.2846         | Z <sub>2</sub> ·-OCH <sub>3</sub>                              | -0.19  |
| 1        | 519.2409        | 519.2412         | <sup>1,3</sup> A <sub>3α</sub>                                 | -0.58  |
| 1        | 527.2076        | 527.2075         | <sup>0,4</sup> A <sub>3α</sub> (2Na-H)                         | 0.19   |
| 1        | 530.2792        | 530.2795         | Z <sub>2</sub> ·-CH <sub>3</sub>                               | -0.57  |
| 1        | 533.2572        | 533.2568         | <sup>3,5</sup> A <sub>3α</sub>                                 | 0.75   |

| z | Exp. m/z | Theo. m/z | Assignment                                                                                           | $\Delta$ , ppm |
|---|----------|-----------|------------------------------------------------------------------------------------------------------|----------------|
| 1 | 544.2950 | 544.2951  | Z <sub>2</sub>                                                                                       | -0.18          |
| 1 | 562.3057 | 562.3056  | Y <sub>2</sub>                                                                                       | 0.18           |
| 1 | 590.3008 | 590.3006  | <sup>1,5</sup> X <sub>2</sub>                                                                        | 0.34           |
| 1 | 618.3317 | 618.3319  | <sup>0,2</sup> X <sub>2</sub>                                                                        | -0.32          |
| 1 | 634.3256 | 634.3268  | <sup>2,5</sup> X <sub>2</sub>                                                                        | -1.89          |
| 1 | 635.2886 | 635.2885  | C <sub>3<math>\alpha</math></sub> /Z <sub>4<math>\alpha</math>'</sub>                                | 0.16           |
| 2 | 644.2909 | 644.2938  | C <sub>4</sub> /Y <sub>4<math>\beta</math></sub>                                                     | -4.50          |
| 2 | 662.8192 | 662.8208  | Z <sub>4<math>\alpha</math>'</sub> -OC <sub>2</sub> H <sub>5</sub> /Y <sub>4<math>\beta</math></sub> | -2.41          |
| 2 | 669.8288 | 669.8286  | Z <sub>4<math>\alpha</math>'</sub> -OCH <sub>3</sub> /Y <sub>4<math>\beta</math></sub>               | 0.30           |
| 2 | 677.8255 | 677.8261  | Z <sub>4<math>\alpha</math>'</sub> -CH <sub>3</sub> /Y <sub>4<math>\beta</math></sub>                | -0.89          |
| 2 | 684.8315 | 684.8339  | Z <sub>4<math>\alpha</math>'</sub> /Y <sub>4<math>\beta</math></sub>                                 | -3.50          |
| 1 | 690.3537 | 690.3530  | Z <sub>3<math>\alpha</math>'</sub> -OC <sub>2</sub> H <sub>5</sub> /Y <sub>4<math>\beta</math></sub> | 1.01           |
| 2 | 693.8374 | 693.8392  | Y <sub>4<math>\alpha</math></sub> /Y <sub>4<math>\beta</math></sub>                                  | -2.59          |
| 1 | 704.3681 | 704.3687  | Z <sub>3<math>\alpha</math>'</sub> -OCH <sub>3</sub> /Y <sub>4<math>\beta</math></sub>               | -0.85          |
| 2 | 707.8368 | 707.8366  | <sup>1,5</sup> X <sub>4<math>\alpha</math></sub> /Y <sub>4<math>\beta</math></sub>                   | 0.28           |
| 1 | 720.3644 | 720.3636  | Z <sub>3<math>\alpha</math>'</sub> -CH <sub>3</sub> /Y <sub>4<math>\beta</math></sub>                | 1.11           |
| 1 | 734.3798 | 734.3792  | Z <sub>3<math>\alpha</math>'</sub> /Y <sub>4<math>\beta</math></sub>                                 | 0.82           |
| 1 | 742.3475 | 742.3456  | Z <sub>3<math>\alpha</math>'</sub> -CH <sub>3</sub> /Y <sub>4<math>\beta</math></sub> (2Na-H)        | 2.56           |
| 2 | 743.8544 | 743.8542  | <sup>1,5</sup> A <sub>5</sub> /Y <sub>4<math>\beta</math></sub>                                      | 0.27           |
| 2 | 750.8434 | 750.8439  | C <sub>5</sub> '-OCH <sub>3</sub> /Y <sub>4<math>\beta</math></sub>                                  | -0.67          |
| 1 | 752.3870 | 752.3898  | Y <sub>3<math>\alpha</math></sub> /Y <sub>4<math>\beta</math></sub>                                  | -3.72          |
| 2 | 757.8518 | 757.8517  | B <sub>5</sub> /Y <sub>4<math>\beta</math></sub>                                                     | 0.13           |
| 2 | 764.8695 | 764.8706  | Z <sub>5<math>\alpha</math>'</sub> -OC <sub>2</sub> H <sub>5</sub> /Y <sub>4<math>\beta</math></sub> | -1.44          |
| 2 | 765.8484 | 765.8492  | C <sub>5</sub> <sup>‡</sup> /Y <sub>4<math>\beta</math></sub>                                        | -1.04          |
| 2 | 766.8559 | 766.8570  | C <sub>5</sub> /Y <sub>4<math>\beta</math></sub>                                                     | -1.43          |
| 2 | 771.8776 | 771.8785  | Z <sub>5<math>\alpha</math>'</sub> -OCH <sub>3</sub> /Y <sub>4<math>\beta</math></sub>               | -1.17          |
| 1 | 774.3722 | 774.3718  | Y <sub>3<math>\alpha</math></sub> /Y <sub>4<math>\beta</math></sub> (2Na-H)                          | 0.52           |
| 2 | 779.8750 | 779.8759  | Z <sub>5<math>\alpha</math>'</sub> -CH <sub>3</sub> /Y <sub>4<math>\beta</math></sub>                | -1.15          |
| 1 | 780.3832 | 780.3847  | <sup>1,5</sup> X <sub>3<math>\alpha</math></sub> /Y <sub>4<math>\beta</math></sub>                   | -1.92          |
| 2 | 786.8829 | 786.8837  | Z <sub>5<math>\alpha</math>'</sub> /Y <sub>4<math>\beta</math></sub>                                 | -1.02          |
| 2 | 795.8863 | 795.8890  | Y <sub>5<math>\alpha</math></sub> /Y <sub>4<math>\beta</math></sub>                                  | -3.39          |
| 2 | 809.8866 | 809.8865  | <sup>1,5</sup> X <sub>5<math>\alpha</math></sub> /Y <sub>4<math>\beta</math></sub>                   | 0.12           |
| 2 | 823.9005 | 823.9021  | <sup>0,2</sup> X <sub>5<math>\alpha</math></sub> /Y <sub>4<math>\beta</math></sub>                   | -1.94          |
| 2 | 831.8890 | 831.8885  | <sup>0,2</sup> A <sub>6</sub> /Y <sub>4<math>\beta</math></sub>                                      | 0.60           |
| 2 | 838.9056 | 838.9074  | <sup>1,4</sup> X <sub>5<math>\alpha</math></sub> /Y <sub>4<math>\beta</math></sub>                   | -2.15          |
| 2 | 853.9135 | 853.9127  | <sup>3,5</sup> X <sub>5<math>\alpha</math></sub> /Y <sub>4<math>\beta</math></sub>                   | 0.94           |
| 2 | 866.4159 | 866.4174  | <sup>1,5</sup> A <sub>6</sub> /Y <sub>4<math>\beta</math></sub>                                      | -1.73          |
| 2 | 867.9275 | 867.9284  | <sup>0,4</sup> X <sub>5<math>\alpha</math></sub> /Y <sub>4<math>\beta</math></sub>                   | -1.04          |

| z | Exp. <i>m/z</i> | Theo. <i>m/z</i> | Assignment                                                                                         | $\Delta$ , ppm |
|---|-----------------|------------------|----------------------------------------------------------------------------------------------------|----------------|
| 2 | 881.9251        | 881.9260         | M-OC <sub>2</sub> H <sub>5</sub>                                                                   | -0.98          |
| 2 | 888.9335        | 888.9338         | M-OCH <sub>3</sub>                                                                                 | -0.33          |
| 2 | 896.9310        | 896.9313         | M-CH <sub>4</sub>                                                                                  | -0.28          |
| 2 | 904.9469        | 904.9467         | M                                                                                                  | 0.22           |
| 1 | 1029.5095       | 1029.5088        | <sup>1,5</sup> A <sub>3<math>\alpha</math></sub>                                                   | 0.68           |
| 1 | 1043.4892       | 1043.4881        | C <sub>3<math>\alpha</math></sub> <sup>•</sup> -OCH <sub>3</sub>                                   | 1.05           |
| 1 | 1073.5020       | 1073.4987        | C <sub>3<math>\alpha</math></sub> <sup>‡</sup>                                                     | 3.07           |
| 1 | 1075.5155       | 1075.5143        | C <sub>3<math>\alpha</math></sub>                                                                  | 1.12           |
| 1 | 1117.5231       | 1117.5249        | <sup>0,4</sup> A <sub>4</sub>                                                                      | -1.61          |
| 1 | 1139.5064       | 1139.5069        | <sup>0,4</sup> A <sub>4</sub> (2Na-H)                                                              | -0.44          |
| 1 | 1145.5592       | 1145.5562        | <sup>3,5</sup> A <sub>4</sub>                                                                      | 2.62           |
| 1 | 1233.5720       | 1233.5722        | C <sub>4</sub> <sup>•</sup> -OCH <sub>3</sub> /Y <sub>4<math>\beta</math></sub>                    | -0.16          |
| 1 | 1247.5872       | 1247.5879        | B <sub>4</sub> /Y <sub>4<math>\beta</math></sub>                                                   | -0.56          |
| 1 | 1263.5831       | 1263.5828        | C <sub>4</sub> <sup>‡</sup> /Y <sub>4<math>\beta</math></sub>                                      | 0.24           |
| 1 | 1265.5941       | 1265.5984        | C <sub>4</sub> /Y <sub>4<math>\beta</math></sub>                                                   | -3.40          |
| 1 | 1316.6666       | 1316.6680        | Z <sub>4<math>\alpha</math></sub> <sup>•</sup> -OCH <sub>3</sub> /Y <sub>4<math>\beta</math></sub> | -1.06          |
| 1 | 1332.6622       | 1332.6629        | Z <sub>4<math>\alpha</math></sub> <sup>•</sup> -CH <sub>3</sub> /Y <sub>4<math>\beta</math></sub>  | -0.53          |
| 1 | 1335.6429       | 1335.6403        | <sup>3,5</sup> A <sub>5</sub> /Y <sub>4<math>\beta</math></sub>                                    | 1.95           |
| 1 | 1346.6762       | 1346.6785        | Z <sub>4<math>\alpha</math></sub> /Y <sub>4<math>\beta</math></sub>                                | -1.71          |
| 1 | 1392.6847       | 1392.6840        | <sup>1,5</sup> X <sub>4<math>\alpha</math></sub> /Y <sub>4<math>\beta</math></sub>                 | 0.50           |
| 1 | 1466.6985       | 1466.6982        | C <sub>5</sub> <sup>•</sup> -OCH <sub>3</sub> /Y <sub>4<math>\beta</math></sub>                    | 0.20           |
| 1 | 1492.7148       | 1492.7142        | B <sub>5</sub> /Y <sub>4<math>\beta</math></sub>                                                   | 0.40           |
| 1 | 1508.7069       | 1508.7091        | C <sub>5</sub> <sup>‡</sup> /Y <sub>4<math>\beta</math></sub>                                      | -1.46          |
| 1 | 1786.8950       | 1786.9043        | M                                                                                                  | -5.20          |

**Table S6.** List of assigned fragments by EED MS<sup>2</sup> of deuterio-reduced and permethylated G2 (Hex<sub>5</sub>HexNAc<sub>4</sub>, [M+2Na]<sup>2+</sup> at *m/z* 1055.0308), acquired on QE-Omnitrap MS (spectrum shown in Figure S4). All fragments are sodium adducts unless labeled otherwise. Multiple assignments are separated by commas; the double dagger symbol (‡) indicates that the fragment has two fewer hydrogens than the canonical structures; the double prime symbol (") indicates that the fragment has two more hydrogens than the canonical structure; the dot symbol (·) indicates a radical.

| <i>z</i> | Exp. <i>m/z</i> | Theo. <i>m/z</i> | Assignment                                                                  | Δ, ppm |
|----------|-----------------|------------------|-----------------------------------------------------------------------------|--------|
| 1        | 181.0834        | 181.0835         | B <sub>1</sub> ·-C <sub>2</sub> H <sub>5</sub> O <sub>2</sub>               | -0.55  |
| 1        | 197.0785        | 197.0784         | C <sub>1</sub> ·-C <sub>2</sub> H <sub>5</sub> O <sub>2</sub>               | 0.51   |
| 1        | 211.0941        | 211.0941         | B <sub>1</sub> ·-OCH <sub>3</sub>                                           | 0.00   |
| 1        | 227.0890        | 227.0890         | C <sub>1</sub> ·-OCH <sub>3</sub>                                           | 0.00   |
| 1        | 239.1476        | 239.1471         | Z <sub>1</sub> ·-C <sub>2</sub> H <sub>5</sub> O <sub>2</sub>               | 2.09   |
| 1        | 241.1047        | 241.1046         | B <sub>1</sub>                                                              | 0.23   |
| 1        | 243.0841        | 243.0839         | C <sub>1</sub> ·-CH <sub>3</sub>                                            | 0.82   |
| 1        | 255.1427        | 255.1420         | Z <sub>1</sub> ·-C <sub>2</sub> H <sub>5</sub> O                            | 2.74   |
| 1        | 259.1152        | 259.1152         | C <sub>1</sub>                                                              | 0.00   |
| 1        | 269.1582        | 269.1577         | Z <sub>1</sub> ·-OCH <sub>3</sub>                                           | 1.86   |
| 1        | 277.1868        | 277.1863         | Z <sub>1</sub> (H)                                                          | 1.89   |
| 1        | 285.1531        | 285.1526         | Z <sub>1</sub> ·-CH <sub>3</sub>                                            | 1.75   |
| 1        | 299.1687        | 299.1682         | Z <sub>1</sub>                                                              | 1.60   |
| 1        | 315.1414        | 315.1414         | <sup>2,4</sup> A <sub>2</sub>                                               | 0.00   |
| 1        | 317.1793        | 317.1788         | Y <sub>1</sub>                                                              | 1.62   |
| 1        | 329.1570        | 329.1571         | <sup>3,5</sup> A <sub>2</sub>                                               | -0.23  |
| 1        | 345.1742        | 345.1737         | <sup>1,5</sup> X <sub>1</sub>                                               | 1.45   |
| 1        | 357.1517        | 357.1520         | <sup>2,5</sup> A <sub>2</sub> -CH <sub>3</sub>                              | -0.84  |
| 1        | 396.1992        | 396.1993         | <sup>1,5</sup> A <sub>2</sub> -C <sub>2</sub> H <sub>5</sub> O <sub>2</sub> | -0.25  |
| 1        | 400.1955        | 400.1942         | <sup>1,4</sup> A <sub>2</sub>                                               | 3.28   |
| 1        | 412.1942        | 412.1943         | <sup>1,5</sup> A <sub>2</sub> -C <sub>2</sub> H <sub>5</sub> O              | -0.24  |
| 1        | 414.2321        | 414.2316         | <sup>0,2</sup> X <sub>1</sub>                                               | 1.33   |
| 1        | 426.2098        | 426.2099         | <sup>1,5</sup> A <sub>2</sub> -OCH <sub>3</sub>                             | -0.23  |
| 1        | 442.2049        | 442.2047         | C <sub>2</sub> ·-C <sub>2</sub> H <sub>5</sub> O <sub>2</sub>               | 0.45   |
| 1        | 458.2001        | 458.1997         | C <sub>2</sub> ·-C <sub>2</sub> H <sub>5</sub> O                            | 0.87   |
| 1        | 458.2363        | 458.2361         | <sup>1,5</sup> A <sub>2</sub>                                               | 0.54   |
| 1        | 464.2490        | 464.2490         | B <sub>2</sub> (H)                                                          | 0.00   |
| 1        | 472.2156        | 472.2153         | C <sub>2</sub> ·-OCH <sub>3</sub>                                           | 0.64   |

| z | Exp. <i>m/z</i> | Theo. <i>m/z</i> | Assignment                                                                  | $\Delta$ , ppm |
|---|-----------------|------------------|-----------------------------------------------------------------------------|----------------|
| 1 | 484.2741        | 484.2734         | Z <sub>2</sub> <sup>•</sup> -C <sub>2</sub> H <sub>5</sub> O <sub>2</sub>   | 1.45           |
| 1 | 486.2311        | 486.2310         | B <sub>2</sub>                                                              | 0.27           |
| 1 | 488.2105        | 488.2102         | C <sub>2</sub> <sup>•</sup> -CH <sub>3</sub>                                | 0.61           |
| 1 | 488.2674        | 488.2683         | <sup>2,4</sup> X <sub>1</sub>                                               | -1.90          |
| 1 | 500.2687        | 500.2683         | Z <sub>2</sub> -C <sub>2</sub> H <sub>5</sub> O                             | 0.80           |
| 1 | 502.2258        | 502.2274         | C <sub>2</sub> <sup>‡</sup>                                                 | -3.19          |
| 1 | 504.2430        | 504.2415         | C <sub>2</sub>                                                              | 2.91           |
| 1 | 514.2845        | 514.2840         | Z <sub>2</sub> <sup>•</sup> -OCH <sub>3</sub>                               | 0.97           |
| 1 | 530.2793        | 530.2789         | Z <sub>2</sub> <sup>•</sup> -CH <sub>3</sub>                                | 0.75           |
| 1 | 544.2953        | 544.2945         | Z <sub>2</sub>                                                              | 1.39           |
| 1 | 546.2745        | 546.2738         | Y <sub>2</sub> <sup>•</sup> -CH <sub>3</sub>                                | 1.28           |
| 1 | 560.2679        | 560.2677         | <sup>1,3</sup> A <sub>3</sub>                                               | 0.27           |
| 1 | 562.3059        | 562.3051         | Y <sub>2</sub>                                                              | 1.41           |
| 1 | 590.3008        | 590.3000         | <sup>1,5</sup> X <sub>2</sub>                                               | 1.31           |
| 1 | 600.2987        | 600.2990         | <sup>1,5</sup> A <sub>3</sub> -C <sub>2</sub> H <sub>5</sub> O <sub>2</sub> | -0.50          |
| 1 | 604.2945        | 604.2940         | <sup>1,4</sup> A <sub>3</sub>                                               | 0.89           |
| 1 | 618.3325        | 618.3313         | <sup>0,2</sup> X <sub>2</sub>                                               | 1.90           |
| 1 | 630.3101        | 630.3096         | <sup>1,5</sup> A <sub>3</sub> -OCH <sub>3</sub>                             | 0.79           |
| 1 | 646.3043        | 646.3045         | C <sub>3</sub> <sup>•</sup> -C <sub>2</sub> H <sub>5</sub> O <sub>2</sub>   | -0.31          |
| 1 | 662.2999        | 662.2995         | C <sub>3</sub> <sup>•</sup> -C <sub>2</sub> H <sub>5</sub> O                | 0.60           |
| 1 | 662.3358        | 662.3358         | <sup>1,5</sup> A <sub>3</sub>                                               | 0.00           |
| 1 | 676.3150        | 676.3151         | C <sub>3</sub> <sup>•</sup> -OCH <sub>3</sub>                               | -0.15          |
| 1 | 686.3601        | 686.3594         | C <sub>3</sub> (H)                                                          | 1.08           |
| 1 | 692.3101        | 692.3100         | C <sub>3</sub> <sup>•</sup> -CH <sub>3</sub>                                | 0.14           |
| 1 | 706.3257        | 706.3257         | C <sub>3</sub> <sup>‡</sup>                                                 | 0.00           |
| 1 | 708.3378        | 708.3413         | C <sub>3</sub>                                                              | -4.95          |
| 2 | 712.3561        | 712.3547         | Z <sub>3</sub>                                                              | 1.96           |
| 2 | 721.3602        | 721.3600         | Y <sub>3</sub>                                                              | 0.30           |
| 2 | 735.3541        | 735.3574         | <sup>1,5</sup> X <sub>3</sub>                                               | -4.55          |
| 1 | 750.3516        | 750.3519         | <sup>0,4</sup> A <sub>4</sub>                                               | -0.36          |
| 1 | 764.3711        | 764.3675         | <sup>1,3</sup> A <sub>4</sub>                                               | 4.68           |
| 1 | 778.3844        | 778.3832         | <sup>3,5</sup> A <sub>4</sub>                                               | 1.58           |
| 2 | 793.3699        | 793.3703         | C <sub>4</sub> <sup>‡</sup>                                                 | -0.45          |
| 2 | 814.4061        | 814.4046         | Z <sub>4</sub>                                                              | 1.85           |
| 2 | 823.4098        | 823.4099         | Y <sub>4</sub>                                                              | -0.09          |
| 2 | 829.3996        | 829.3990         | <sup>3,5</sup> A <sub>5</sub>                                               | 0.70           |
| 2 | 837.4079        | 837.4073         | <sup>1,5</sup> X <sub>4</sub>                                               | 0.68           |
| 2 | 866.4322        | 866.4283         | <sup>1,4</sup> X <sub>4</sub>                                               | 4.54           |
| 2 | 871.9345        | 871.9363         | <sup>0,2</sup> X <sub>4</sub>                                               | -2.01          |



| z | Exp. <i>m/z</i> | Theo. <i>m/z</i> | Assignment                                                                         | $\Delta$ , ppm |
|---|-----------------|------------------|------------------------------------------------------------------------------------|----------------|
| 1 | 880.4153        | 880.4149         | C <sub>4</sub> /Z <sub>3<math>\beta</math></sub>                                   | 0.45           |
| 2 | 893.9418        | 893.9385         | <sup>1,5</sup> A <sub>5</sub>                                                      | 3.68           |
| 2 | 896.9442        | 896.9450         | B <sub>5</sub> (H+Na)                                                              | -0.88          |
| 2 | 905.9478        | 905.9503         | C <sub>5</sub> (H+Na)                                                              | -2.73          |
| 2 | 914.9546        | 914.9552         | Z <sub>5</sub> <sup>-</sup> -C <sub>2</sub> H <sub>5</sub> O                       | -0.66          |
| 2 | 915.9315        | 915.9334         | C <sub>5</sub> <sup>‡</sup>                                                        | -2.07          |
| 2 | 921.9628        | 921.9631         | Z <sub>5</sub> <sup>-</sup> -OCH <sub>3</sub>                                      | -0.33          |
| 2 | 929.9603        | 929.9605         | Z <sub>5</sub> <sup>-</sup> -CH <sub>3</sub>                                       | -0.22          |
| 2 | 936.9680        | 936.9678         | Z <sub>5</sub>                                                                     | 0.26           |
| 2 | 944.9645        | 944.9652         | Y <sub>5</sub> <sup>‡</sup>                                                        | -0.74          |
| 2 | 951.9609        | 951.9622         | <sup>3,5</sup> A <sub>6</sub>                                                      | -1.34          |
| 2 | 959.9706        | 959.9705         | <sup>1,5</sup> X <sub>5</sub>                                                      | 0.11           |
| 2 | 973.9826        | 973.9861         | <sup>0,2</sup> X <sub>5</sub>                                                      | -3.64          |
| 2 | 981.9756        | 981.9727         | <sup>0,2</sup> A <sub>6</sub>                                                      | 2.91           |
| 2 | 988.9913        | 988.9914         | <sup>1,4</sup> X <sub>5</sub>                                                      | -0.13          |
| 2 | 1016.5006       | 1016.5017        | <sup>1,5</sup> A <sub>6</sub>                                                      | -1.05          |
| 2 | 1018.0114       | 1018.0124        | <sup>0,4</sup> X <sub>5</sub>                                                      | -0.94          |
| 2 | 1033.0168       | 1033.0176        | M-C <sub>2</sub> H <sub>4</sub> O                                                  | -0.77          |
| 2 | 1039.0178       | 1039.0176        | M-CH <sub>4</sub> O                                                                | 0.19           |
| 2 | 1055.0308       | 1055.0307        | M                                                                                  | 0.09           |
| 1 | 1100.5094       | 1100.5090        | C <sub>4</sub> /Y <sub>4</sub> <sup>‡</sup>                                        | 0.38           |
| 1 | 1125.5409       | 1125.5412        | C <sub>5</sub> /Z <sub>3</sub>                                                     | -0.27          |
| 1 | 1160.5901       | 1160.5888        | Y <sub>4<math>\alpha</math></sub> /Y <sub>4<math>\beta</math></sub>                | 1.12           |
| 1 | 1188.5830       | 1188.5837        | <sup>1,5</sup> X <sub>4<math>\alpha</math></sub> /Y <sub>4<math>\beta</math></sub> | -0.59          |
| 1 | 1329.6368       | 1329.6410        | C <sub>5</sub> /Z <sub>4</sub>                                                     | -3.16          |
| 1 | 1357.6995       | 1357.6940        | Z <sub>3</sub> <sup>-</sup> -C <sub>2</sub> H <sub>5</sub> O                       | 4.05           |
| 1 | 1371.7117       | 1371.7097        | Z <sub>3</sub> <sup>-</sup> -OCH <sub>3</sub>                                      | 1.46           |
| 1 | 1387.7055       | 1387.7046        | Z <sub>4<math>\alpha</math></sub> /Y <sub>5<math>\beta</math></sub>                | 0.65           |
| 1 | 1401.7226       | 1401.7202        | Z <sub>3</sub>                                                                     | 1.72           |
| 1 | 1417.7161       | 1417.7152        | Y <sub>3</sub> <sup>‡</sup>                                                        | 0.67           |
| 1 | 1419.7264       | 1419.7308        | Y <sub>3</sub>                                                                     | -3.07          |
| 1 | 1447.7265       | 1447.7257        | <sup>1,5</sup> X <sub>3</sub>                                                      | 0.58           |
| 1 | 1519.7606       | 1519.7615        | <sup>1,5</sup> A <sub>4</sub>                                                      | -0.57          |
| 1 | 1563.7497       | 1563.7513        | C <sub>4</sub> <sup>‡</sup>                                                        | -1.02          |
| 1 | 1565.7600       | 1565.7669        | C <sub>4</sub>                                                                     | -4.44          |
| 1 | 1605.8217       | 1605.8200        | Z <sub>4</sub>                                                                     | 1.08           |
| 1 | 1623.8292       | 1623.8305        | Y <sub>4</sub>                                                                     | -0.82          |
| 1 | 1635.8058       | 1635.8088        | <sup>3,5</sup> A <sub>5</sub>                                                      | -1.84          |
| 1 | 1651.8276       | 1651.8254        | <sup>1,5</sup> X <sub>4</sub>                                                      | 1.31           |

| <i>z</i> | Exp. <i>m/z</i> | Theo. <i>m/z</i> | Assignment                                    | $\Delta$ , ppm |
|----------|-----------------|------------------|-----------------------------------------------|----------------|
| 1        | 1766.8697       | 1766.8671        | C <sub>5</sub> <sup>*</sup> -OCH <sub>3</sub> | 1.47           |
| 1        | 1792.8719       | 1792.8827        | B <sub>5</sub>                                | -6.03          |
| 1        | 2013.0342       | 2013.0355        | <sup>0,4</sup> X <sub>5</sub>                 | -0.64          |
| 1        | 2087.0753       | 2087.0723        | M                                             | 1.44           |

**Table S7.** List of assigned fragments by HCD-EED MS<sup>3</sup> experiment of the Y<sub>4</sub> ion from deuterio-reduced and permethylated Hex<sub>9</sub>GlcNAc<sub>2</sub> at *m/z* 904.9469, acquired on a QE-Omnitrap platform (spectrum shown in Figure S5b). All fragments are sodium adducts unless labeled otherwise. Multiple assignments are separated by commas; the double dagger symbol (‡) indicates that the fragment has two fewer hydrogens than the canonical structures; the double prime symbol (") indicates that the fragment has two more hydrogens than the canonical structure; the dot symbol (·) indicates a radical.

| <i>z</i> | Exp. <i>m/z</i> | Theo. <i>m/z</i> | Assignment                                       | Δ, ppm |
|----------|-----------------|------------------|--------------------------------------------------|--------|
| 1        | 227.0888        | 227.0890         | C <sub>1β</sub> ·-OCH <sub>3</sub>               | -0.88  |
| 1        | 245.0997        | 245.0996         | C <sub>1α</sub> /Y <sub>4α</sub>                 | 0.41   |
| 1        | 259.1149        | 259.1152         | C <sub>1β</sub>                                  | -1.19  |
| 1        | 277.1868        | 277.1868         | Z <sub>1</sub> (H)                               | 0.00   |
| 1        | 299.1676        | 299.1682         | Z <sub>1</sub>                                   | -2.08  |
| 1        | 317.1786        | 317.1788         | Y <sub>1</sub>                                   | -0.59  |
| 1        | 329.1566        | 329.1571         | <sup>3,5</sup> A <sub>2β</sub>                   | -1.44  |
| 1        | 432.2229        | 432.2228         | B <sub>3β</sub> /Z <sub>5β</sub> (H)             | 0.23   |
| 1        | 464.2492        | 464.2490         | B <sub>2β</sub> (H)                              | 0.43   |
| 1        | 486.2311        | 486.2310         | B <sub>2β</sub>                                  | 0.27   |
| 1        | 504.2427        | 504.2415         | C <sub>2β</sub>                                  | 2.32   |
| 1        | 544.2953        | 544.2945         | Z <sub>2</sub>                                   | 1.39   |
| 1        | 560.2685        | 560.2692         | <sup>1,3</sup> A <sub>3β</sub>                   | -1.25  |
| 1        | 562.3042        | 562.3051         | Y <sub>2</sub>                                   | -1.62  |
| 1        | 590.3008        | 590.3000         | <sup>1,5</sup> X <sub>2</sub>                    | 1.31   |
| 2        | 634.8070        | 634.8074         | <sup>1,4</sup> X <sub>4β</sub> /Y <sub>4α</sub>  | -0.61  |
| 1        | 662.2998        | 662.2994         | Z <sub>3β</sub> /C <sub>5</sub> /Y <sub>4α</sub> | 0.60   |
| 1        | 690.3295        | 690.3307         | B <sub>3β</sub>                                  | -1.74  |
| 2        | 694.3564        | 694.3562         | Z <sub>5β</sub> /Y <sub>4α</sub> (H+Na)          | 0.29   |
| 1        | 706.3257        | 706.3257         | C <sub>3β</sub> ‡                                | 0.06   |
| 1        | 734.3794        | 734.3787         | Y <sub>3β</sub> /Z <sub>3α</sub>                 | 0.95   |
| 1        | 750.3511        | 750.3519         | <sup>0,2</sup> A <sub>6</sub> /Y <sub>4α</sub>   | -1.03  |
| 1        | 866.3987        | 866.3992         | Z <sub>5β</sub> /C <sub>4</sub> /Y <sub>4α</sub> | -0.58  |
| 1        | 880.4156        | 880.4149         | Z <sub>3α</sub> /C <sub>4</sub> /Y <sub>4α</sub> | 0.80   |
| 1        | 938.4795        | 938.4784         | Z <sub>3β</sub> /Y <sub>4α</sub>                 | 1.13   |
| 1        | 956.4879        | 956.4890         | Y <sub>3β</sub> /Y <sub>4α</sub>                 | -1.16  |
| 1        | 984.4846        | 984.4839         | <sup>1,5</sup> X <sub>3β</sub> /Y <sub>4α</sub>  | 0.69   |
| 1        | 1056.5216       | 1056.5197        | <sup>1,5</sup> A <sub>4</sub> /Y <sub>4α</sub>   | 1.78   |
| 1        | 1100.5093       | 1100.5096        | C <sub>4</sub> ‡/Y <sub>4α</sub>                 | -0.23  |

| <i>z</i> | Exp. <i>m/z</i> | Theo. <i>m/z</i> | Assignment                                                     | $\Delta$ , ppm |
|----------|-----------------|------------------|----------------------------------------------------------------|----------------|
| 1        | 1142.5772       | 1142.5782        | Z <sub>4β</sub> /Y <sub>4α</sub>                               | -0.89          |
| 1        | 1158.5740       | 1158.5737        | Y <sub>4β</sub> <sup>‡</sup> /Y <sub>4α</sub>                  | 0.26           |
| 1        | 1160.5867       | 1160.5888        | Y <sub>4β</sub> /Y <sub>4α</sub>                               | -1.79          |
| 1        | 1172.5648       | 1172.5671        | <sup>3,5</sup> A <sub>5</sub> /Y <sub>4α</sub>                 | -1.93          |
| 1        | 1188.5844       | 1188.5837        | <sup>1,5</sup> X <sub>4β</sub> /Y <sub>4α</sub>                | 0.59           |
| 1        | 1246.6245       | 1246.6256        | <sup>1,4</sup> X <sub>4β</sub> /Y <sub>4α</sub>                | -0.85          |
| 1        | 1301.6460       | 1301.6460        | <sup>1,5</sup> A <sub>5</sub> /Y <sub>4α</sub>                 | 0.00           |
| 1        | 1303.6250       | 1303.6254        | C <sub>5</sub> <sup>•</sup> -OCH <sub>3</sub> /Y <sub>4α</sub> | -0.27          |
| 1        | 1329.6444       | 1329.6410        | B <sub>5</sub> /Y <sub>4α</sub>                                | 2.59           |
| 1        | 1347.6545       | 1347.6515        | C <sub>5</sub> /Y <sub>4α</sub>                                | 2.21           |
| 1        | 1387.7053       | 1387.7045        | Z <sub>5β</sub> /Y <sub>4α</sub>                               | 0.55           |
| 1        | 1401.7217       | 1401.7202        | Z <sub>3α</sub>                                                | 1.08           |
| 1        | 1405.7167       | 1405.7151        | Y <sub>5β</sub> /Y <sub>4α</sub>                               | 1.14           |
| 1        | 1419.7288       | 1419.7308        | Y <sub>3α</sub>                                                | -1.38          |
| 1        | 1433.7104       | 1433.7100        | <sup>1,5</sup> X <sub>5β</sub> /Y <sub>4α</sub>                | 0.27           |
| 1        | 1447.7269       | 1447.7257        | <sup>1,5</sup> X <sub>3α</sub>                                 | 0.85           |
| 1        | 1477.7163       | 1477.7145        | <sup>0,2</sup> A <sub>6</sub> /Y <sub>4α</sub>                 | 1.20           |
| 1        | 1549.7931       | 1549.7937        | <sup>1,3</sup> X <sub>3α</sub>                                 | -0.42          |
| 1        | 1591.8040       | 1591.8043        | Y <sub>4α</sub> <sup>•</sup> -OCH <sub>4</sub>                 | -0.21          |
| 1        | 1623.8269       | 1623.8305        | Y <sub>4α</sub>                                                | -2.23          |
